# Supplementary material for: Regulation of RUVBL1-RUVBL2 AAA-ATPases by the nonsense-mediated mRNA decay factor DHX34, as evidenced by Cryo-EM
Source: eLife journal article supplement (doi:10.7554/elife.63042), 2020-11-18
Supplement: fig5-data1 [file Figure 5 - source data 1 explanations.docx]

Sheets related to Figure 5:

Sheet 1: Figure5_source_1: Measurements for sample His-RUVBL1-RUVBL2 from Figure 5 Panels A and B.

Sheet 2: Figure5_source_2: Measurements for sample His-RUVBL1-RUVBL2E300Q from Figure 5 Panels A and C.

Sheet 3: Figure5_source_3: Measurements for sample His-RUVBL1E303Q-RUVBL2from Figure 5 Panels A and C.

Sheet 4: Figure5_source_4: Measurements for sample His-RUVBL1E303Q-RUVBL2E300Q from Figure 5 Panel A.

Sheet 5: Figure5_source_5: Measurements for sample His-RUVBL1-RUVBL2 + DHX34D279A from Figure 5 Panel B.

Sheet 6: Figure5_source_6: Measurements for sample His-RUVBL1-RUVBL2E300Q + DHX34D279A from Figure 5 Panel C.

Sheet 7: Figure5_source_7: Measurements for sample His-RUVBL1E303Q-RUVBL2+ DHX34D279A from Figure 5 Panel C.

- Graphic in Figure 5 Panel A: plotting of the average of ATP hydrolysis indicated as percentage for His-RUVBL1-RUVBL2 (Figure5_source_1), His-RUVBL1-RUVBL2E300Q (Figure5_source_2), His-RUVBL1E303Q-RUVBL2 (Figure5_source_3) and His-RUVBL1E303Q-RUVBL2E300Q (Figure5_ source_4).

- Graphic in Figure 5 Panel B: plotting of the average of ATP hydrolysis indicated as percentage for His-RUVBL1-RUVBL2 (Figure5_source_1) and His-RUVBL1-RUVBL2 + DHX34D279A (Figure5_source_5).

- Graphic in Figure 5 Panel C: plotting of the average of ATP hydrolysis indicated as percentage for His-RUVBL1-RUVBL2E300Q (Figure5_source_2), His-RUVBL1-RUVBL2E300Q + DHX34D279A (Figure5_source_6), His-RUVBL1E303Q-RUVBL2 (Figure5_source_3) and His-RUVBL1E303Q-RUVBL2+ DHX34D279A (Figure5_source_7).

Sheets related to Figure 5 – figure supplement 1:

Sheet 8: Figure5_source_8: Measurements for sample DHX34 from Figure 5 – figure supplement 1 Panels D and E.

Sheet 9: Figure5_source_9: Measurements for sample DHX34D279A from Figure 5 – figure supplement 1 Panels D and E.

- Graphic in Figure 5 – figure supplement 1 Panel D: plotting of replica 1 from Figure5_source_8 (DHX34) and replica 2 from Figure5_source_9 (DHX34 D279A).

- Graphic in Figure 5 – figure supplement 1 Panel D: plotting of the average of ATP consumption indicated as percentage for DHX34 (Figure5_source_8) and DHX34D279A (Figure5_source_9).

Graphics in Figure 5 – figure supplement 2:

- Graphic in Figure 5 – figure supplement 2 Panel A: plotting of replica 4 from Figure5_source_1 (His-RUVBL1-RUVBL2), replica 3 from Figure5_source_2 (His-RUVBL1-RUVBL2E300Q), replica 1 from Figure5_source_3 (His-RUVBL1E303Q-RUVBL2) and replica 1 from Figure5_source_4 (His-RUVBL1E303Q-RUVBL2 E300Q).

- Graphic in Figure 5 – figure supplement 2 Panel B: plotting of replica 4 from Figure5_source_1 (His-RUVBL1-RUVBL2) and replica 3 from Figure5_source_5 (His-RUVBL1-RUVBL2 + DHX34D279A).

- Graphic in Figure 5 – figure supplement 2 Panel C: plotting of replica 3 from Figure5_source_2 (His-RUVBL1-RUVBL2E300Q) and replica 2 from Figure5_source_6 (His-RUVBL1-RUVBL2E300Q + DHX34D279A).

- Graphic in Figure 5 – figure supplement 2 Panel D: plotting of replica 1 from Figure5_source_3 (His-RUVBL1E303Q-RUVBL2) and replica 1 from Figure5_source_7 (His-RUVBL1E303Q-RUVBL2 + DHX34D279A).

Sheets related to Figure 5 – figure supplement 3:

Sheet 10: Figure5_S3_source_10: Measurements for sample Untagged RUVBL1-RUVBL2 from Figure 5 – figure supplement 3 Panels A, B, C and D.

Sheet 11: Figure5_S3_source_11: Measurements for sample Untagged RUVBL1-RUVBL2 + DHX34D279A from Figure 5 – figure supplement 3 Panels B and D.

Sheet 12: Figure5_S3_source_12: Measurements for sample Untagged RUVBL1-RUVBL2E300Q from Figure 5 – figure supplement 3 Panels E and G.

Sheet 13: Figure5_S3_source_13: Measurements for sample Untagged RUVBL1-RUVBL2E300Q + DHX34D279A from Figure 5 – figure supplement 3 Panels E and G.

Sheet 14: Figure5_S3_source_14: Measurements for sample Untagged RUVBL1E303Q-RUVBL2 from Figure 5 – figure supplement 3 Panels F and G.

Sheet 15: Figure5_S3_source_15: Measurements for sample Untagged RUVBL1E303Q-RUVBL2 + DHX34D279A from Figure 5 – figure supplement 3 Panels F and G.

- Graphic in Figure 5 – figure supplement 3 Panel A: plotting of replica 4 from Figure5_source_1 (His-RUVBL1-RUVBL2) and replica 1 from Figure5_S3_source_10 (Untagged RUVBL1-RUVBL2).

- Graphic in Figure 5 – figure supplement 3 Panel A: plotting of the average of ATP consumption indicated as percentage for His-RUVBL1-RUVBL2 (Figure5_source_1) and Untagged RUVBL1-RUVBL2 (Figure5_S3_source_10).

- Graphic in Figure 5 – figure supplement 3 Panel C: plotting of replica 1 from Figure5_S3_source_10 (Untagged RUVBL1-RUVBL2) and replica 1 from Figure5_S3_source_11 (Untagged RUVBL1-RUVBL2 + DHX34D279A).

- Graphic in Figure 5 – figure supplement 3 Panel D: plotting of the average of ATP consumption indicated as percentage for Untagged RUVBL1-RUVBL2 (Figure5_S3_source_10) and Untagged RUVBL1-RUVBL2 + DHX34D279A (Figure5_S3_source_11).

- Graphic in Figure 5 – figure supplement 3 Panel E: plotting of replica 1 from Figure5_S3_source_12 (Untagged RUVBL1-RUVBL2E300Q) and replica 2 from Figure5_S3_source_13 (Untagged RUVBL1-RUVBL2E300Q + DHX34D279A).

- Graphic in Figure 5 – figure supplement 3 Panel F: plotting of replica 3 from Figure5_S3_source_14 (Untagged RUVBL1E303Q-RUVBL2) and replica 1 from Figure5_S3_source_15 (Untagged RUVBL1E303Q-RUVBL2 + DHX34D279A).

- Graphic in Figure 5 – figure supplement 3 Panel G: plotting of the average of ATP consumption indicated as percentage for Untagged RUVBL1-RUVBL2E300Q (Figure5_S3_source_12), Untagged RUVBL1-RUVBL2E300Q + DHX34D279A (Figure5_S3_source_13), Untagged RUVBL1E303Q-RUVBL2 (Figure5_S3_source_14) and Untagged RUVBL1E303Q-RUVBL2 + DHX34D279A (Figure5_S3_source_15).
