# Supplementary material for: Regulation of RUVBL1-RUVBL2 AAA-ATPases by the nonsense-mediated mRNA decay factor DHX34, as evidenced by Cryo-EM
Source: eLife journal article supplement (doi:10.7554/elife.63042), 2020-11-18
Supplement: supp [file elife_poa_e63042_Figure_5_source_data_1.xlsx]

## Sheet: Figure5_source_1
	Time (min)	Abs 340 nm Replica 1	Abs 340 nm Replica 2	Abs 340 nm Replica 3	Abs 340 nm Replica 4			Equation linear regression trendline	R²
SAMPLE: His-RUVBL1-RUVBL2	0	1.42094	1.51047	1.41019	1.47516		Replica 1	y = -0,0012x + 1,4586	R² = 0,9873
	0.0833333	1.42152	1.51076	1.40869	1.47499		Replica 2	y = -0,0018x + 1,62	R² = 0,9864
	0.166667	1.42069	1.51035	1.40949	1.47485		Replica 3	y = -0,0015x + 1,456	R² = 0,9923
	0.25	1.42087	1.51044	1.40917	1.47483		Replica 4	y = -0,0014x + 1,5189	R² = 0,9925
	0.333333	1.4208	1.5104	1.40957	1.47437
	0.416667	1.42086	1.51043	1.40889	1.47438
	0.5	1.42072	1.51036	1.40815	1.47458
	0.583333	1.4206	1.5103	1.40978	1.47437
	0.666667	1.42036	1.51018	1.40852	1.47459
	0.75	1.42006	1.51003	1.40825	1.47368
	0.833333	1.42121	1.5106	1.40837	1.47338
	0.916667	1.42133	1.51066	1.40844	1.47397
	1	1.421	1.5105	1.40897	1.47355
	1.08333	1.42035	1.51018	1.408	1.4738
	1.16667	1.42022	1.51011	1.4083	1.47367
	1.25	1.42035	1.51018	1.40855	1.47425
	1.33333	1.41941	1.50971	1.40822	1.47316
	1.41667	1.41981	1.50991	1.40721	1.47357
	1.5	1.42059	1.5103	1.40825	1.47291
	1.58333	1.41931	1.50965	1.40733	1.47301
	1.66667	1.42023	1.51012	1.40744	1.47344
	1.75	1.42103	1.51052	1.40672	1.47293
	1.83333	1.41965	1.50983	1.40758	1.47317
	1.91667	1.41984	1.50992	1.40748	1.47301
	2	1.41897	1.50949	1.40786	1.47235
	2.08333	1.41873	1.50937	1.407	1.47239
	2.16667	1.41845	1.50923	1.40693	1.47218
	2.25	1.41979	1.5099	1.40834	1.47255
	2.33333	1.42035	1.51018	1.40599	1.47202
	2.41667	1.41905	1.50953	1.40742	1.47246
	2.5	1.41993	1.50997	1.40561	1.47277
	2.58333	1.41855	1.50928	1.40615	1.4713
	2.66667	1.41923	1.50962	1.40607	1.47187
	2.75	1.41877	1.50938	1.40732	1.47232
	2.83333	1.41935	1.50968	1.40665	1.47229
	2.91667	1.41933	1.50967	1.40626	1.47138
	3	1.41912	1.50956	1.4067	1.47159
	3.08333	1.4191	1.50955	1.40561	1.47126
	3.16667	1.41979	1.5099	1.40598	1.47223
	3.25	1.41862	1.50931	1.40572	1.47191
	3.33333	1.4183	1.50915	1.40574	1.47128
	3.41667	1.41898	1.50949	1.40616	1.47179
	3.5	1.41923	1.50962	1.40438	1.47074
	3.58333	1.41901	1.50951	1.40515	1.4714
	3.66667	1.41829	1.50915	1.40609	1.47084
	3.75	1.41712	1.50856	1.40549	1.47024
	3.83333	1.4181	1.50905	1.40522	1.47113
	3.91667	1.4178	1.5089	1.4061	1.4712
	4	1.41764	1.50882	1.4049	1.46992
	4.08333	1.41844	1.50922	1.40457	1.47079
	4.16667	1.41751	1.50876	1.40501	1.4698
	4.25	1.41751	1.50876	1.40448	1.46986
	4.33333	1.41798	1.50899	1.40375	1.47016
	4.41667	1.41695	1.50848	1.40389	1.47024
	4.5	1.41578	1.50789	1.40355	1.47032
	4.58333	1.41659	1.50829	1.40433	1.46965
	4.66667	1.41726	1.50863	1.40298	1.47
	4.75	1.41724	1.50862	1.40487	1.46948
	4.83333	1.41833	1.50917	1.40376	1.46952
	4.91667	1.41765	1.50883	1.40343	1.46936
	5	1.41723	1.50862	1.40341	1.46984
	5.08333	1.41737	1.50869	1.4037	1.46979
	5.16667	1.41687	1.50843	1.40345	1.46976
	5.25	1.41736	1.50868	1.40336	1.46877
	5.33333	1.41636	1.50818	1.40263	1.46863
	5.41667	1.41621	1.50811	1.40212	1.46868
	5.5	1.41672	1.50836	1.40348	1.46907
	5.58333	1.41643	1.50822	1.40371	1.46848
	5.66667	1.41633	1.50816	1.40258	1.46924
	5.75	1.41519	1.5076	1.40264	1.46823
	5.83333	1.4169	1.50845	1.40191	1.46758
	5.91667	1.4145	1.50725	1.40216	1.46898
	6	1.41529	1.50765	1.40237	1.46781
	6.08333	1.41515	1.50758	1.40226	1.46901
	6.16667	1.41562	1.50781	1.40174	1.46742
	6.25	1.41482	1.50741	1.401	1.46666
	6.33333	1.41536	1.50768	1.40136	1.46778
	6.41667	1.41703	1.50852	1.40204	1.46764
	6.5	1.41584	1.50792	1.4029	1.46737
	6.58333	1.41527	1.50764	1.40089	1.46804
	6.66667	1.4157	1.50785	1.40151	1.46713
	6.75	1.41549	1.50774	1.40089	1.46763
	6.83333	1.41519	1.5076	1.40085	1.46604
	6.91667	1.41542	1.50771	1.40077	1.46751
	7	1.41504	1.50752	1.39994	1.46662
	7.08333	1.4145	1.50725	1.40119	1.46637
	7.16667	1.41487	1.50744	1.40073	1.46636
	7.25	1.41414	1.50707	1.40099	1.46646
	7.33333	1.41433	1.50717	1.3998	1.46696
	7.41667	1.41453	1.50727	1.39986	1.46576
	7.5	1.41367	1.50684	1.39987	1.46662
	7.58333	1.4135	1.50675	1.40077	1.46653
	7.66667	1.41471	1.50736	1.39977	1.46586
	7.75	1.41393	1.50697	1.39938	1.46589
	7.83333	1.41311	1.50656	1.39936	1.46588
	7.91667	1.4142	1.5071	1.39908	1.4655
	8	1.41398	1.50699	1.3994	1.46626
	8.08333	1.41363	1.50682	1.40002	1.46558
	8.16667	1.41408	1.50704	1.39901	1.46427
	8.25	1.41394	1.50697	1.3994	1.46493
	8.33333	1.41283	1.50642	1.39903	1.4646
	8.41667	1.41335	1.50667	1.39871	1.46516
	8.5	1.41218	1.50609	1.39889	1.46439
	8.58333	1.41336	1.50668	1.39841	1.46381
	8.66667	1.41282	1.50641	1.39927	1.46382
	8.75	1.4126	1.5063	1.39794	1.46437
	8.83333	1.41294	1.50647	1.3981	1.46374
	8.91667	1.41193	1.50596	1.39791	1.46508
	9	1.41185	1.50592	1.39894	1.46365
	9.08333	1.41271	1.50636	1.39818	1.4639
	9.16667	1.41295	1.50648	1.39721	1.46304
	9.25	1.41285	1.50643	1.39795	1.46328
	9.33333	1.41253	1.50626	1.39753	1.46424
	9.41667	1.41291	1.50646	1.39808	1.46259
	9.5	1.41202	1.50601	1.3967	1.46298
	9.58333	1.41295	1.50648	1.39751	1.46281
	9.66667	1.41164	1.50582	1.39713	1.46278
	9.75	1.411	1.5055	1.39734	1.46289
	9.83333	1.41153	1.50577	1.39728	1.46269
	9.91667	1.41091	1.50545	1.39712	1.46251
	10	1.41157	1.50578	1.39678	1.46203
	10.0833	1.41142	1.50571	1.39656	1.46109
	10.1667	1.41125	1.50562	1.39648	1.46239
	10.25	1.41098	1.50549	1.39615	1.46263
	10.3333	1.41084	1.50542	1.3955	1.46227
	10.4167	1.41041	1.50521	1.39557	1.46202
	10.5	1.41144	1.50572	1.39559	1.46151
	10.5833	1.41025	1.50513	1.39577	1.46067
	10.6667	1.41018	1.50509	1.39607	1.46165
	10.75	1.41061	1.5053	1.39626	1.46105
	10.8333	1.41028	1.50514	1.39474	1.46105
	10.9167	1.41022	1.50511	1.39536	1.46096
	11	1.40993	1.50496	1.39454	1.4609
	11.0833	1.41019	1.5051	1.39442	1.46093
	11.1667	1.41026	1.50513	1.39442	1.46076
	11.25	1.41055	1.50528	1.39419	1.46051
	11.3333	1.40836	1.50418	1.3947	1.46089
	11.4167	1.41042	1.50521	1.3949	1.46068
	11.5	1.40899	1.50449	1.3948	1.4597
	11.5833	1.40992	1.50496	1.39461	1.45982
	11.6667	1.40901	1.5045	1.39417	1.45995
	11.75	1.40898	1.50449	1.39327	1.46014
	11.8333	1.40917	1.50459	1.39322	1.4594
	11.9167	1.40941	1.5047	1.39363	1.45943
	12	1.40959	1.5048	1.39302	1.46036
	12.0833	1.40848	1.50424	1.39291	1.45936
	12.1667	1.40899	1.50449	1.39254	1.46008
	12.25	1.40834	1.50417	1.39296	1.45852
	12.3333	1.40823	1.50412	1.39249	1.45961
	12.4167	1.40796	1.50398	1.3934	1.45925
	12.5	1.40836	1.50418	1.39265	1.45962
	12.5833	1.40819	1.50409	1.3928	1.45944
	12.6667	1.40812	1.50406	1.39288	1.45962
	12.75	1.40846	1.50423	1.39188	1.45852
	12.8333	1.40793	1.50396	1.39187	1.45862
	12.9167	1.40731	1.50366	1.39204	1.45839
	13	1.40786	1.50393	1.39145	1.45825
	13.0833	1.40712	1.50356	1.39196	1.4579
	13.1667	1.40719	1.5036	1.39114	1.45843
	13.25	1.40754	1.50377	1.39156	1.4574
	13.3333	1.40717	1.50359	1.39057	1.45651
	13.4167	1.40634	1.50317	1.3918	1.45724
	13.5	1.40715	1.50358	1.39097	1.45687
	13.5833	1.4069	1.50345	1.39058	1.45726
	13.6667	1.40651	1.50326	1.39078	1.45651
	13.75	1.40583	1.50292	1.39005	1.45751
	13.8333	1.40625	1.50313	1.38944	1.45683
	13.9167	1.40596	1.50298	1.39013	1.4566
	14	1.4052	1.5026	1.38947	1.45771
	14.0833	1.40606	1.50303	1.38937	1.45655
	14.1667	1.40588	1.50294	1.39068	1.45723
	14.25	1.40535	1.50267	1.39033	1.45596
	14.3333	1.40614	1.50307	1.38976	1.45565
	14.4167	1.40564	1.50282	1.38964	1.457
	14.5	1.40578	1.50289	1.38898	1.45596
	14.5833	1.40438	1.50219	1.38875	1.4563
	14.6667	1.40491	1.50246	1.39025	1.45529
	14.75	1.40565	1.50283	1.38936	1.45548
	14.8333	1.4051	1.50255	1.38874	1.45541
	14.9167	1.40489	1.50245	1.38826	1.45502
	15	1.40545	1.50273	1.38858	1.45569
	15.0833	1.4045	1.50225	1.38762	1.45472
	15.1667	1.40376	1.50188	1.38776	1.45352
	15.25	1.40478	1.50239	1.38774	1.45449
	15.3333	1.40436	1.50218	1.38831	1.45441
	15.4167	1.40453	1.50226	1.38766	1.45324
	15.5	1.40475	1.50238	1.38768	1.45409
	15.5833	1.40386	1.50193	1.38732	1.45384
	15.6667	1.40376	1.50188	1.38767	1.45347
	15.75	1.40423	1.50212	1.38615	1.45391
	15.8333	1.40284	1.50142	1.38716	1.45396
	15.9167	1.40325	1.50163	1.38755	1.45361
	16	1.40333	1.50167	1.38667	1.45362
	16.0833	1.40348	1.50174	1.38686	1.45371
	16.1667	1.40372	1.50186	1.38619	1.45232
	16.25	1.40363	1.50182	1.38597	1.45264
	16.3333	1.40226	1.50113	1.38671	1.45254
	16.4167	1.403	1.5015	1.38555	1.45214
	16.5	1.40336	1.50168	1.38494	1.4523
	16.5833	1.40203	1.50102	1.38646	1.45257
	16.6667	1.40306	1.50153	1.38548	1.45337
	16.75	1.40218	1.50109	1.38457	1.45204
	16.8333	1.40243	1.50122	1.38521	1.45268
	16.9167	1.40234	1.50117	1.38437	1.45268
	17	1.40076	1.50038	1.38483	1.45177
	17.0833	1.40315	1.50157	1.3848	1.45153
	17.1667	1.402	1.501	1.38505	1.45174
	17.25	1.40143	1.50072	1.38494	1.45152
	17.3333	1.40163	1.50082	1.38396	1.451
	17.4167	1.40148	1.50074	1.38393	1.45084
	17.5	1.40155	1.50077	1.38392	1.45174
	17.5833	1.40115	1.50057	1.38264	1.44982
	17.6667	1.40161	1.50081	1.3837	1.45039
	17.75	1.40042	1.50021	1.38456	1.45006
	17.8333	1.40054	1.50027	1.38431	1.45049
	17.9167	1.40077	1.50039	1.3835	1.45015
	18	1.40088	1.50044	1.3834	1.45028
	18.0833	1.40115	1.50057	1.38363	1.44961
	18.1667	1.40017	1.50008	1.38283	1.44995
	18.25	1.40025	1.50013	1.38239	1.44945
	18.3333	1.39966	1.49983	1.38318	1.44898
	18.4167	1.39952	1.49976	1.3825	1.44959
	18.5	1.39966	1.49983	1.38243	1.45003
	18.5833	1.39944	1.49972	1.38244	1.4496
	18.6667	1.3995	1.49975	1.38205	1.44917
	18.75	1.39837	1.49918	1.38127	1.4483
	18.8333	1.39931	1.49966	1.38113	1.44826
	18.9167	1.39873	1.49937	1.38207	1.44879
	19	1.39867	1.49934	1.38141	1.44835
	19.0833	1.39864	1.49932	1.38207	1.44805
	19.1667	1.3993	1.49965	1.38084	1.44835
	19.25	1.39914	1.49957	1.38111	1.44725
	19.3333	1.39865	1.49933	1.38092	1.44697
	19.4167	1.3988	1.4994	1.38085	1.44817
	19.5	1.39839	1.4992	1.38061	1.44647
	19.5833	1.39932	1.49966	1.38084	1.44804
	19.6667	1.3982	1.4991	1.38018	1.44748
	19.75	1.39815	1.49907	1.37993	1.44718
	19.8333	1.3982	1.4991	1.37947	1.44729
	19.9167	1.39817	1.49909	1.38039	1.44626
	20	1.39707	1.49853	1.37978	1.44648

## Sheet: Figure5_source_2
	Time (min)	Abs 340 nm Replica 1	Abs 340 nmReplica 2	Abs 340 nmReplica 3		Equation linear regression trendline	R²
His-RUVBL1_RUVBL2_E300Q	0	1.46199	1.54395	1.45882	Replica 1	y = -0,0006x + 1,4798	R² = 0,9663
	0.0833333	1.46177	1.5425	1.45854	Replica 2	y = -0,0005x + 1,5591	R² = 0,9347
	0.166667	1.46149	1.54403	1.45903	Replica 3	y = -0,0008x + 1,4824	R² = 0,9843
	0.25	1.46277	1.54282	1.45817
	0.333333	1.46254	1.54294	1.45838
	0.416667	1.46104	1.54268	1.45881
	0.5	1.4606	1.5431	1.45864
	0.583333	1.46185	1.54268	1.45744
	0.666667	1.46104	1.54271	1.45808
	0.75	1.46087	1.54201	1.45771
	0.833333	1.46246	1.54307	1.45769
	0.916667	1.46149	1.54208	1.45813
	1	1.46031	1.54184	1.45782
	1.08333	1.46144	1.5417	1.45701
	1.16667	1.45986	1.54191	1.45712
	1.25	1.46028	1.54106	1.45812
	1.33333	1.46041	1.5408	1.45761
	1.41667	1.46058	1.54092	1.45741
	1.5	1.46033	1.54248	1.45788
	1.58333	1.46195	1.54209	1.45758
	1.66667	1.46056	1.54117	1.45812
	1.75	1.46005	1.54143	1.45739
	1.83333	1.46107	1.54261	1.4572
	1.91667	1.45903	1.54046	1.45746
	2	1.46062	1.54178	1.45786
	2.08333	1.46042	1.54119	1.45623
	2.16667	1.4596	1.54115	1.45664
	2.25	1.45971	1.54212	1.45694
	2.33333	1.45912	1.54062	1.45683
	2.41667	1.45999	1.54183	1.45699
	2.5	1.45943	1.54103	1.45729
	2.58333	1.46019	1.54124	1.45583
	2.66667	1.4596	1.53998	1.45701
	2.75	1.45937	1.54054	1.45631
	2.83333	1.45949	1.54	1.45636
	2.91667	1.45927	1.54019	1.45615
	3	1.45828	1.54156	1.45618
	3.08333	1.45877	1.54045	1.45638
	3.16667	1.45877	1.54037	1.4565
	3.25	1.45874	1.54008	1.45604
	3.33333	1.45799	1.54076	1.45575
	3.41667	1.45938	1.54052	1.45588
	3.5	1.45876	1.53947	1.45727
	3.58333	1.45872	1.54139	1.45583
	3.66667	1.45728	1.54056	1.45691
	3.75	1.45779	1.53992	1.45596
	3.83333	1.45899	1.54046	1.45587
	3.91667	1.4582	1.53965	1.45635
	4	1.45775	1.54093	1.45636
	4.08333	1.45854	1.53999	1.45663
	4.16667	1.45817	1.53977	1.4553
	4.25	1.45886	1.53995	1.45575
	4.33333	1.45772	1.53927	1.45588
	4.41667	1.45705	1.5397	1.4559
	4.5	1.45801	1.54042	1.45585
	4.58333	1.45786	1.54043	1.45508
	4.66667	1.45636	1.54044	1.45571
	4.75	1.45606	1.54024	1.4557
	4.83333	1.45804	1.54038	1.45428
	4.91667	1.45618	1.54056	1.45602
	5	1.45772	1.54085	1.45532
	5.08333	1.45751	1.53937	1.4553
	5.16667	1.45762	1.54093	1.45551
	5.25	1.45707	1.54086	1.45358
	5.33333	1.45663	1.54089	1.45497
	5.41667	1.45673	1.54063	1.45434
	5.5	1.45804	1.54151	1.45503
	5.58333	1.45639	1.54055	1.45449
	5.66667	1.45701	1.53938	1.45476
	5.75	1.45692	1.53969	1.45527
	5.83333	1.45691	1.53985	1.45533
	5.91667	1.45653	1.54027	1.45493
	6	1.4572	1.54011	1.45428
	6.08333	1.4562	1.54039	1.45462
	6.16667	1.45589	1.54028	1.45479
	6.25	1.45553	1.54066	1.4533
	6.33333	1.45745	1.54033	1.45445
	6.41667	1.4564	1.54033	1.45408
	6.5	1.45607	1.53888	1.45432
	6.58333	1.45649	1.53912	1.45386
	6.66667	1.45675	1.53932	1.45314
	6.75	1.45653	1.53943	1.45385
	6.83333	1.457	1.53985	1.45376
	6.91667	1.45664	1.54	1.45368
	7	1.45616	1.53978	1.45411
	7.08333	1.45613	1.53933	1.45377
	7.16667	1.45617	1.53922	1.45499
	7.25	1.45596	1.54064	1.45371
	7.33333	1.45583	1.54078	1.4541
	7.41667	1.4566	1.53978	1.4537
	7.5	1.45469	1.54107	1.45342
	7.58333	1.45513	1.53958	1.45315
	7.66667	1.45498	1.53976	1.45213
	7.75	1.45579	1.53927	1.45305
	7.83333	1.45615	1.53834	1.45309
	7.91667	1.45629	1.53992	1.45296
	8	1.45473	1.5389	1.45261
	8.08333	1.45574	1.53915	1.45264
	8.16667	1.45431	1.53947	1.45215
	8.25	1.45583	1.53913	1.45182
	8.33333	1.4544	1.53935	1.45275
	8.41667	1.45558	1.53917	1.45175
	8.5	1.45507	1.53872	1.45221
	8.58333	1.45561	1.53836	1.45312
	8.66667	1.45491	1.53789	1.4521
	8.75	1.45541	1.53923	1.45246
	8.83333	1.4558	1.53938	1.45238
	8.91667	1.45531	1.53806	1.45159
	9	1.45483	1.53876	1.45251
	9.08333	1.45541	1.53762	1.45201
	9.16667	1.45518	1.5376	1.4525
	9.25	1.45432	1.53742	1.45149
	9.33333	1.45528	1.53848	1.45198
	9.41667	1.45493	1.53844	1.45177
	9.5	1.45358	1.53801	1.45199
	9.58333	1.45508	1.53707	1.4528
	9.66667	1.45439	1.53772	1.45179
	9.75	1.45479	1.53754	1.45234
	9.83333	1.45413	1.53656	1.4518
	9.91667	1.45377	1.53645	1.45209
	10	1.45532	1.53641	1.45152
	10.0833	1.45497	1.53747	1.45139
	10.1667	1.45338	1.53724	1.45092
	10.25	1.45484	1.53661	1.45186
	10.3333	1.45395	1.53616	1.45124
	10.4167	1.45462	1.53564	1.45131
	10.5	1.45333	1.53671	1.451
	10.5833	1.45438	1.53608	1.45095
	10.6667	1.4534	1.53687	1.45007
	10.75	1.4536	1.53708	1.45033
	10.8333	1.45369	1.53617	1.4505
	10.9167	1.45364	1.53609	1.44972
	11	1.45301	1.53582	1.45066
	11.0833	1.45347	1.53617	1.45043
	11.1667	1.45346	1.53637	1.45134
	11.25	1.45325	1.53586	1.45162
	11.3333	1.45276	1.5357	1.4501
	11.4167	1.45294	1.53607	1.45124
	11.5	1.45268	1.53533	1.45035
	11.5833	1.45343	1.53442	1.44999
	11.6667	1.45369	1.53562	1.44972
	11.75	1.45363	1.53546	1.44953
	11.8333	1.45386	1.53552	1.45054
	11.9167	1.45281	1.53613	1.4498
	12	1.45357	1.53563	1.45005
	12.0833	1.45341	1.53564	1.44915
	12.1667	1.45335	1.53559	1.44894
	12.25	1.45348	1.53525	1.45041
	12.3333	1.45397	1.53505	1.44941
	12.4167	1.45283	1.53484	1.45081
	12.5	1.45295	1.5352	1.45006
	12.5833	1.45232	1.53491	1.44984
	12.6667	1.45293	1.53445	1.44833
	12.75	1.45266	1.53411	1.44855
	12.8333	1.45344	1.53622	1.44832
	12.9167	1.45251	1.53431	1.44927
	13	1.45205	1.53514	1.4502
	13.0833	1.45301	1.53374	1.44977
	13.1667	1.45307	1.53491	1.44902
	13.25	1.45315	1.53502	1.44911
	13.3333	1.45216	1.53479	1.44928
	13.4167	1.45351	1.53437	1.44866
	13.5	1.45158	1.53518	1.44812
	13.5833	1.45279	1.53418	1.44869
	13.6667	1.45152	1.53513	1.44955
	13.75	1.45219	1.53317	1.44822
	13.8333	1.45158	1.53388	1.44804
	13.9167	1.45187	1.5342	1.44854
	14	1.45195	1.53497	1.44783
	14.0833	1.45208	1.53442	1.4483
	14.1667	1.45187	1.53479	1.44843
	14.25	1.45243	1.53463	1.44807
	14.3333	1.45083	1.53378	1.44815
	14.4167	1.45193	1.53366	1.44813
	14.5	1.45106	1.53446	1.44819
	14.5833	1.45232	1.53407	1.44773
	14.6667	1.45264	1.53463	1.44739
	14.75	1.45198	1.53413	1.44773
	14.8333	1.45179	1.53411	1.44767
	14.9167	1.45028	1.53418	1.44767
	15	1.45198	1.53368	1.44821
	15.0833	1.45174	1.53359	1.44717
	15.1667	1.45118	1.53454	1.44818
	15.25	1.45088	1.53589	1.4469
	15.3333	1.45091	1.53403	1.44721
	15.4167	1.4523	1.534	1.44715
	15.5	1.45032	1.53426	1.44689
	15.5833	1.45199	1.53409	1.44673
	15.6667	1.45092	1.53431	1.4467
	15.75	1.45117	1.53404	1.4463
	15.8333	1.45131	1.53366	1.44725
	15.9167	1.45122	1.53209	1.44579
	16	1.45187	1.53282	1.44543
	16.0833	1.45161	1.53317	1.44556
	16.1667	1.45152	1.53375	1.44691
	16.25	1.45113	1.5335	1.44766
	16.3333	1.45118	1.53324	1.44596
	16.4167	1.45	1.53256	1.44628
	16.5	1.45136	1.53327	1.44618
	16.5833	1.45068	1.53365	1.44582
	16.6667	1.45101	1.53306	1.44469
	16.75	1.45112	1.53345	1.44475
	16.8333	1.45051	1.53404	1.44628
	16.9167	1.4505	1.53421	1.44552
	17	1.45007	1.53248	1.4455
	17.0833	1.45008	1.53289	1.44573
	17.1667	1.45005	1.53349	1.44493
	17.25	1.45082	1.53219	1.44567
	17.3333	1.45139	1.53296	1.4456
	17.4167	1.45025	1.53395	1.44407
	17.5	1.44993	1.53344	1.44515
	17.5833	1.45026	1.53375	1.44445
	17.6667	1.44942	1.53326	1.44533
	17.75	1.44971	1.53342	1.44548
	17.8333	1.45009	1.53419	1.44408
	17.9167	1.44942	1.53288	1.44572
	18	1.44985	1.53423	1.44505
	18.0833	1.45035	1.53223	1.44501
	18.1667	1.44967	1.53302	1.44431
	18.25	1.44903	1.53375	1.44445
	18.3333	1.44885	1.53406	1.44445
	18.4167	1.44955	1.53378	1.44379
	18.5	1.44952	1.53304	1.44482
	18.5833	1.45039	1.5336	1.44412
	18.6667	1.44996	1.53363	1.44409
	18.75	1.44888	1.5333	1.44445
	18.8333	1.44851	1.53405	1.44365
	18.9167	1.44957	1.53271	1.44416
	19	1.44894	1.53328	1.44434
	19.0833	1.44947	1.53332	1.44381
	19.1667	1.44934	1.53313	1.44374
	19.25	1.44825	1.53305	1.44262
	19.3333	1.44942	1.53386	1.44375
	19.4167	1.44871	1.53306	1.44299
	19.5	1.44899	1.53335	1.44346
	19.5833	1.44924	1.53261	1.44298
	19.6667	1.44963	1.5326	1.44349
	19.75	1.44828	1.53138	1.44246
	19.8333	1.44825	1.53299	1.44295
	19.9167	1.44878	1.53208	1.44391
	20		1.53311	1.44322

## Sheet: Figure5_source_3
	Time (min)	Abs 340 nm Replica 1	Abs 340 nmReplica 2	Abs 340 nmReplica 3		Equation linear regression trendline	R²
His-RUVBL1_E303Q_RUVBL2	0	1.47027	1.43698	1.44429	Replica 1	y = -0,0004x + 1,4848	R² = 0,9619
	0.0833333	1.47059	1.43671	1.44516	Replica 2	y = -0,0003x + 1,4446	R² = 0,8915
	0.166667	1.47137	1.43691	1.44473	Replica 3	y = -0,0002x + 1,4512	R² = 0,8462
	0.25	1.47043	1.43603	1.44554
	0.333333	1.47179	1.43656	1.44475
	0.416667	1.47139	1.43714	1.44469
	0.5	1.47143	1.43494	1.44472
	0.583333	1.47103	1.43681	1.44503
	0.666667	1.47161	1.43715	1.44452
	0.75	1.471	1.43686	1.44426
	0.833333	1.47014	1.43708	1.4438
	0.916667	1.47014	1.43633	1.4446
	1	1.47066	1.43682	1.44438
	1.08333	1.4715	1.43614	1.44371
	1.16667	1.47104	1.43717	1.44477
	1.25	1.47172	1.4373	1.44459
	1.33333	1.47001	1.43566	1.44482
	1.41667	1.47007	1.43626	1.44465
	1.5	1.47157	1.43601	1.44416
	1.58333	1.4698	1.43651	1.44378
	1.66667	1.47008	1.43707	1.44562
	1.75	1.47016	1.43584	1.44414
	1.83333	1.47099	1.43669	1.44495
	1.91667	1.46994	1.43646	1.44297
	2	1.46987	1.43746	1.44421
	2.08333	1.47056	1.43708	1.44407
	2.16667	1.47059	1.43588	1.44356
	2.25	1.47096	1.43669	1.44443
	2.33333	1.47049	1.43582	1.44338
	2.41667	1.46966	1.43616	1.44499
	2.5	1.46978	1.43613	1.44364
	2.58333	1.47079	1.43624	1.44437
	2.66667	1.47014	1.43541	1.44368
	2.75	1.47011	1.43567	1.44474
	2.83333	1.46995	1.4362	1.44424
	2.91667	1.47037	1.43616	1.44534
	3	1.4703	1.43701	1.44479
	3.08333	1.47015	1.43661	1.44406
	3.16667	1.47068	1.43585	1.44387
	3.25	1.46928	1.4356	1.44407
	3.33333	1.46999	1.43616	1.44395
	3.41667	1.4694	1.4355	1.44426
	3.5	1.4693	1.43647	1.445
	3.58333	1.46918	1.4358	1.445
	3.66667	1.47056	1.43642	1.44461
	3.75	1.47003	1.43664	1.44482
	3.83333	1.46897	1.43549	1.44313
	3.91667	1.47	1.43535	1.44423
	4	1.46953	1.43583	1.44471
	4.08333	1.46939	1.43551	1.44444
	4.16667	1.4694	1.43534	1.4438
	4.25	1.46887	1.43607	1.4444
	4.33333	1.46903	1.43586	1.44402
	4.41667	1.46876	1.43599	1.44479
	4.5	1.46901	1.43642	1.443
	4.58333	1.46922	1.43561	1.44278
	4.66667	1.46893	1.43691	1.44434
	4.75	1.46907	1.43553	1.44374
	4.83333	1.46932	1.43585	1.4448
	4.91667	1.46972	1.43566	1.44328
	5	1.46894	1.43506	1.44388
	5.08333	1.46955	1.43527	1.44384
	5.16667	1.46867	1.43583	1.44408
	5.25	1.46836	1.43609	1.44431
	5.33333	1.47019	1.43533	1.44357
	5.41667	1.4685	1.43563	1.44352
	5.5	1.46867	1.43502	1.44405
	5.58333	1.46798	1.43556	1.44315
	5.66667	1.46829	1.43525	1.44339
	5.75	1.4683	1.43499	1.44316
	5.83333	1.46843	1.43592	1.44373
	5.91667	1.46945	1.4347	1.44356
	6	1.46885	1.43543	1.44414
	6.08333	1.46877	1.43536	1.44345
	6.16667	1.46854	1.43528	1.44306
	6.25	1.46831	1.43551	1.44331
	6.33333	1.46899	1.43532	1.44308
	6.41667	1.46834	1.43531	1.44415
	6.5	1.46811	1.43549	1.44346
	6.58333	1.46857	1.43531	1.44374
	6.66667	1.46884	1.43469	1.44303
	6.75	1.46913	1.43552	1.44207
	6.83333	1.46903	1.43479	1.44285
	6.91667	1.46751	1.43507	1.44372
	7	1.46775	1.43497	1.44352
	7.08333	1.46853	1.43469	1.44361
	7.16667	1.46753	1.43499	1.4428
	7.25	1.46766	1.43498	1.44309
	7.33333	1.46775	1.43559	1.44322
	7.41667	1.46748	1.43564	1.44313
	7.5	1.46792	1.43542	1.44267
	7.58333	1.46862	1.43525	1.44259
	7.66667	1.46775	1.43515	1.44373
	7.75	1.46771	1.43414	1.44391
	7.83333	1.46729	1.43516	1.44191
	7.91667	1.46725	1.43509	1.44342
	8	1.4678	1.43521	1.4427
	8.08333	1.46813	1.43523	1.44297
	8.16667	1.46734	1.43437	1.44227
	8.25	1.46771	1.43461	1.44243
	8.33333	1.46717	1.43497	1.4431
	8.41667	1.46758	1.43513	1.44243
	8.5	1.46785	1.43614	1.44326
	8.58333	1.4676	1.43403	1.44281
	8.66667	1.46785	1.43439	1.44372
	8.75	1.46775	1.4347	1.44263
	8.83333	1.46633	1.43567	1.44307
	8.91667	1.46727	1.43476	1.44285
	9	1.46722	1.43528	1.44289
	9.08333	1.46763	1.43424	1.44264
	9.16667	1.46714	1.43455	1.44397
	9.25	1.46747	1.4349	1.44167
	9.33333	1.46648	1.43489	1.44266
	9.41667	1.46808	1.43387	1.44317
	9.5	1.4662	1.4338	1.44169
	9.58333	1.46626	1.43467	1.44282
	9.66667	1.4657	1.43431	1.44355
	9.75	1.46639	1.43431	1.44264
	9.83333	1.46648	1.43479	1.4433
	9.91667	1.46691	1.43415	1.44185
	10	1.46725	1.43448	1.44207
	10.0833	1.46578	1.43512	1.44265
	10.1667	1.46702	1.43465	1.44321
	10.25	1.46634	1.43481	1.44287
	10.3333	1.46791	1.4346	1.44182
	10.4167	1.46644	1.43574	1.44324
	10.5	1.46693	1.43524	1.44162
	10.5833	1.46617	1.43497	1.44215
	10.6667	1.46779	1.43425	1.44234
	10.75	1.46628	1.43512	1.44212
	10.8333	1.46598	1.43485	1.44182
	10.9167	1.46645	1.43401	1.44257
	11	1.4666	1.43399	1.44289
	11.0833	1.46711	1.43386	1.44244
	11.1667	1.46666	1.43457	1.44248
	11.25	1.46637	1.4339	1.4418
	11.3333	1.46549	1.43427	1.44259
	11.4167	1.46606	1.43384	1.44221
	11.5	1.46592	1.43327	1.44249
	11.5833	1.4666	1.43252	1.44324
	11.6667	1.46624	1.43469	1.44165
	11.75	1.4661	1.43348	1.44287
	11.8333	1.46533	1.43303	1.44188
	11.9167	1.46598	1.43394	1.44215
	12	1.46585	1.43405	1.44202
	12.0833	1.46566	1.43367	1.44226
	12.1667	1.46593	1.43426	1.44158
	12.25	1.4652	1.43394	1.44147
	12.3333	1.46576	1.43363	1.4411
	12.4167	1.46588	1.43387	1.44104
	12.5	1.46573	1.43377	1.44121
	12.5833	1.46537	1.43316	1.44132
	12.6667	1.46591	1.43369	1.44202
	12.75	1.46615	1.43375	1.44146
	12.8333	1.46548	1.43384	1.44216
	12.9167	1.46459	1.43321	1.44153
	13	1.46478	1.43434	1.44187
	13.0833	1.46471	1.43395	1.44177
	13.1667	1.46617	1.43239	1.44255
	13.25	1.46584	1.43307	1.44185
	13.3333	1.46548	1.43251	1.44178
	13.4167	1.46461	1.43347	1.44198
	13.5	1.46531	1.43284	1.44159
	13.5833	1.46532	1.43258	1.44069
	13.6667	1.46543	1.43339	1.44142
	13.75	1.46534	1.434	1.44197
	13.8333	1.46452	1.43423	1.44214
	13.9167	1.46524	1.43201	1.44091
	14	1.46478	1.43367	1.4423
	14.0833	1.46484	1.43333	1.44096
	14.1667	1.46327	1.43286	1.44195
	14.25	1.46436	1.43298	1.44125
	14.3333	1.46438	1.43382	1.44166
	14.4167	1.46564	1.4322	1.44169
	14.5	1.46539	1.43351	1.44193
	14.5833	1.46552	1.43232	1.44251
	14.6667	1.46307	1.43287	1.44136
	14.75	1.46533	1.43364	1.44203
	14.8333	1.46468	1.43324	1.44057
	14.9167	1.46445	1.43232	1.44154
	15	1.46416	1.43323	1.44162
	15.0833	1.46401	1.43334	1.44122
	15.1667	1.46447	1.43331	1.44139
	15.25	1.46414	1.43371	1.44254
	15.3333	1.46462	1.43223	1.44202
	15.4167	1.46409	1.43395	1.44099
	15.5	1.46458	1.43343	1.44118
	15.5833	1.46489	1.43331	1.4407
	15.6667	1.46485	1.43331	1.44153
	15.75	1.46439	1.43354	1.4418
	15.8333	1.46369	1.43357	1.44117
	15.9167	1.46343	1.43333	1.44214
	16	1.46354	1.43291	1.44205
	16.0833	1.46435	1.43287	1.44176
	16.1667	1.46377	1.4326	1.44068
	16.25	1.46484	1.4334	1.44129
	16.3333	1.46296	1.43313	1.44287
	16.4167	1.46419	1.43217	1.44128
	16.5	1.46336	1.43264	1.44092
	16.5833	1.46391	1.43373	1.44073
	16.6667	1.46398	1.43339	1.44044
	16.75	1.46388	1.43281	1.44167
	16.8333	1.46389	1.43273	1.44122
	16.9167	1.46327	1.43207	1.44144
	17	1.46398	1.43248	1.44143
	17.0833	1.46353	1.43241	1.44126
	17.1667	1.46361	1.43237	1.44177
	17.25	1.46346	1.43287	1.44132
	17.3333	1.46428	1.43249	1.44091
	17.4167	1.46295	1.43231	1.44126
	17.5	1.46337	1.43188	1.44143
	17.5833	1.46309	1.43146	1.44182
	17.6667	1.46271	1.43202	1.44094
	17.75	1.46383	1.43257	1.44127
	17.8333	1.46377	1.43317	1.44135
	17.9167	1.46386	1.43207	1.44124
	18	1.46385	1.43206	1.44163
	18.0833	1.46272	1.43243	1.44075
	18.1667	1.46244	1.43163	1.44133
	18.25	1.46289	1.43131	1.44017
	18.3333	1.46302	1.43197	1.44063
	18.4167	1.46331	1.43147	1.44056
	18.5	1.46298	1.43178	1.44085
	18.5833	1.46283	1.43228	1.44046
	18.6667	1.46382	1.43198	1.44071
	18.75	1.46276	1.43148	1.44005
	18.8333	1.46306	1.43262	1.44069
	18.9167	1.46224	1.432	1.4402
	19	1.46309	1.43231	1.44146
	19.0833	1.46312	1.43244	1.44096
	19.1667	1.46245	1.43239	1.44092
	19.25	1.46289	1.43261	1.4411
	19.3333	1.46233	1.4324	1.44086
	19.4167	1.46324	1.43116	1.44065
	19.5	1.46281	1.43155	1.4403
	19.5833	1.46182	1.43215	1.44061
	19.6667	1.46119	1.43179	1.44015
	19.75	1.4623	1.43229	1.44016
	19.8333	1.46249	1.43181	1.44048
	19.9167	1.46241	1.43157	1.44071
	20		1.43127	1.44092

## Sheet: Figure5_source_4
	Time (min)	Abs 340 nm Replica 1	Abs 340 nmReplica 2	Abs 340 nmReplica 3		Equation linear regression trendline	R²
His-RUVBL1_E303Q_RUVBL2_E300Q	0	1.46241	1.43261	1.44516	Replica 1	y = -7E-05x + 1,4641	R² = 0,3307
	0.0833333	1.46107	1.43351	1.44557	Replica 2	y = -4E-05x + 1,4347	R² = 0,1825
	0.166667	1.4616	1.43399	1.4456	Replica 3	y = -6E-06x + 1,4456	R² = 0,0043
	0.25	1.46247	1.43215	1.44569
	0.333333	1.46235	1.43381	1.44505
	0.416667	1.46264	1.43315	1.44538
	0.5	1.46158	1.43341	1.44605
	0.583333	1.46154	1.43435	1.44637
	0.666667	1.46199	1.43301	1.44513
	0.75	1.46196	1.43307	1.44575
	0.833333	1.46181	1.4338	1.44512
	0.916667	1.4628	1.43284	1.44523
	1	1.46205	1.43354	1.44565
	1.08333	1.46172	1.43353	1.44573
	1.16667	1.46194	1.4325	1.44548
	1.25	1.46226	1.43284	1.44599
	1.33333	1.46179	1.43299	1.44629
	1.41667	1.46149	1.43317	1.44573
	1.5	1.46228	1.43325	1.44436
	1.58333	1.4625	1.43298	1.4463
	1.66667	1.46176	1.43275	1.44508
	1.75	1.46172	1.43314	1.44534
	1.83333	1.46146	1.43401	1.44506
	1.91667	1.46134	1.43366	1.44542
	2	1.46183	1.43346	1.44581
	2.08333	1.46174	1.43379	1.44519
	2.16667	1.46153	1.43329	1.44639
	2.25	1.46214	1.43359	1.44568
	2.33333	1.46063	1.43393	1.44483
	2.41667	1.46182	1.43311	1.44424
	2.5	1.46088	1.4333	1.44546
	2.58333	1.46193	1.43381	1.44522
	2.66667	1.46073	1.43319	1.44521
	2.75	1.46109	1.43319	1.44486
	2.83333	1.46187	1.43343	1.44551
	2.91667	1.46154	1.43369	1.44532
	3	1.46196	1.43308	1.44475
	3.08333	1.46059	1.43313	1.4447
	3.16667	1.4616	1.43293	1.44528
	3.25	1.46252	1.43259	1.44624
	3.33333	1.46143	1.43402	1.44532
	3.41667	1.462	1.43335	1.44564
	3.5	1.46243	1.43432	1.44449
	3.58333	1.46227	1.43256	1.44533
	3.66667	1.46182	1.43305	1.44511
	3.75	1.4622	1.43338	1.44443
	3.83333	1.46293	1.43268	1.44554
	3.91667	1.46124	1.43242	1.44555
	4	1.46135	1.43268	1.44557
	4.08333	1.46193	1.43399	1.44546
	4.16667	1.46205	1.43372	1.44502
	4.25	1.46267	1.43387	1.44468
	4.33333	1.46252	1.43374	1.44562
	4.41667	1.46115	1.43324	1.44641
	4.5	1.46056	1.43319	1.44476
	4.58333	1.46257	1.43385	1.44482
	4.66667	1.462	1.43306	1.44495
	4.75	1.4614	1.43416	1.44521
	4.83333	1.46092	1.43349	1.4454
	4.91667	1.46193	1.43255	1.4457
	5	1.46071	1.43367	1.44469
	5.08333	1.46143	1.43276	1.44488
	5.16667	1.46223	1.43279	1.44509
	5.25	1.4618	1.43306	1.44497
	5.33333	1.46179	1.43247	1.44589
	5.41667	1.46182	1.43446	1.44503
	5.5	1.46153	1.43299	1.44569
	5.58333	1.46176	1.43227	1.44522
	5.66667	1.46188	1.43319	1.44537
	5.75	1.46209	1.43343	1.44505
	5.83333	1.46104	1.43239	1.44525
	5.91667	1.46242	1.43365	1.44568
	6	1.46265	1.43302	1.44563
	6.08333	1.46192	1.43222	1.44413
	6.16667	1.46192	1.43335	1.44485
	6.25	1.46132	1.43342	1.44445
	6.33333	1.4627	1.43319	1.4453
	6.41667	1.46151	1.43288	1.44578
	6.5	1.46142	1.43232	1.4455
	6.58333	1.46239	1.43296	1.44551
	6.66667	1.46232	1.43187	1.44514
	6.75	1.46209	1.43314	1.44636
	6.83333	1.46123	1.43318	1.44548
	6.91667	1.4615	1.43386	1.44541
	7	1.46247	1.43229	1.44515
	7.08333	1.46165	1.43378	1.44539
	7.16667	1.46169	1.43382	1.44579
	7.25	1.46116	1.43192	1.4458
	7.33333	1.46209	1.43291	1.44548
	7.41667	1.46075	1.43364	1.44528
	7.5	1.46147	1.43307	1.44589
	7.58333	1.46106	1.43304	1.44432
	7.66667	1.46166	1.43388	1.44652
	7.75	1.46269	1.43242	1.4464
	7.83333	1.46134	1.43381	1.4455
	7.91667	1.46163	1.43281	1.44576
	8	1.46148	1.43337	1.44556
	8.08333	1.46253	1.43354	1.44626
	8.16667	1.46158	1.43233	1.44542
	8.25	1.46098	1.43395	1.44568
	8.33333	1.46173	1.43366	1.44506
	8.41667	1.46294	1.43364	1.44511
	8.5	1.46224	1.4328	1.44479
	8.58333	1.4617	1.43305	1.44548
	8.66667	1.46235	1.43309	1.44555
	8.75	1.4617	1.43318	1.44562
	8.83333	1.46228	1.43333	1.44597
	8.91667	1.46231	1.43354	1.44499
	9	1.46118	1.43287	1.44456
	9.08333	1.4612	1.43254	1.44557
	9.16667	1.46183	1.43267	1.44565
	9.25	1.4619	1.43417	1.44551
	9.33333	1.46157	1.4334	1.44496
	9.41667	1.46142	1.43393	1.44631
	9.5	1.46091	1.43396	1.44543
	9.58333	1.46155	1.43329	1.44495
	9.66667	1.46151	1.43278	1.44606
	9.75	1.46209	1.43356	1.44565
	9.83333	1.4617	1.43367	1.44467
	9.91667	1.46177	1.43357	1.44654
	10	1.46191	1.43332	1.44536
	10.0833	1.46165	1.43297	1.44505
	10.1667	1.46177	1.43293	1.44637
	10.25	1.46213	1.4328	1.44596
	10.3333	1.46137	1.4325	1.44512
	10.4167	1.46125	1.43292	1.44571
	10.5	1.4611	1.43384	1.4455
	10.5833	1.46151	1.43243	1.44542
	10.6667	1.46117	1.43275	1.44524
	10.75	1.46133	1.4331	1.44569
	10.8333	1.46093	1.43271	1.44412
	10.9167	1.46064	1.43347	1.44514
	11	1.46164	1.43335	1.4439
	11.0833	1.46203	1.43358	1.44578
	11.1667	1.46099	1.43191	1.44536
	11.25	1.46093	1.43268	1.44577
	11.3333	1.46202	1.43269	1.44473
	11.4167	1.46016	1.43192	1.44417
	11.5	1.46105	1.43285	1.44487
	11.5833	1.461	1.43186	1.44578
	11.6667	1.46119	1.4325	1.445
	11.75	1.46062	1.43224	1.44638
	11.8333	1.46073	1.43279	1.44574
	11.9167	1.46146	1.43235	1.44635
	12	1.46081	1.43299	1.44455
	12.0833	1.46173	1.43294	1.44517
	12.1667	1.46141	1.4333	1.4456
	12.25	1.46177	1.43341	1.4456
	12.3333	1.46128	1.43272	1.44567
	12.4167	1.461	1.4324	1.44488
	12.5	1.4607	1.43351	1.44578
	12.5833	1.46126	1.43319	1.44569
	12.6667	1.46187	1.43276	1.44518
	12.75	1.46047	1.43288	1.4453
	12.8333	1.46064	1.43212	1.44441
	12.9167	1.46205	1.43317	1.44513
	13	1.46069	1.43401	1.44498
	13.0833	1.46124	1.4336	1.44556
	13.1667	1.46144	1.43367	1.44532
	13.25	1.46105	1.433	1.44519
	13.3333	1.46204	1.43267	1.44567
	13.4167	1.46191	1.43244	1.4464
	13.5	1.46107	1.43235	1.44468
	13.5833	1.46013	1.43255	1.44557
	13.6667	1.45964	1.43223	1.44567
	13.75	1.4615	1.43222	1.44513
	13.8333	1.461	1.43258	1.44454
	13.9167	1.46118	1.43293	1.44569
	14	1.46025	1.43326	1.44596
	14.0833	1.46076	1.43299	1.44598
	14.1667	1.46249	1.43355	1.44546
	14.25	1.46125	1.43264	1.44457
	14.3333	1.4611	1.43334	1.44537
	14.4167	1.46077	1.43255	1.44513
	14.5	1.46133	1.43247	1.4449
	14.5833	1.46092	1.43225	1.44561
	14.6667	1.46105	1.43338	1.44515
	14.75	1.46194	1.43266	1.44478
	14.8333	1.46163	1.43278	1.44539
	14.9167	1.46039	1.43294	1.44466
	15	1.46025	1.43309	1.44457
	15.0833	1.46063	1.43332	1.44539
	15.1667	1.46104	1.43298	1.4459
	15.25	1.46049	1.43282	1.44528
	15.3333	1.46064	1.43281	1.44417
	15.4167	1.46027	1.43264	1.44575
	15.5	1.46032	1.43237	1.44458
	15.5833	1.46075	1.43232	1.4462
	15.6667	1.46173	1.43302	1.44481
	15.75	1.46071	1.43283	1.44505
	15.8333	1.46145	1.43297	1.4445
	15.9167	1.46077	1.43272	1.44548
	16	1.46045	1.43237	1.44544
	16.0833	1.46174	1.43252	1.44566
	16.1667	1.46121	1.43304	1.44548
	16.25	1.46156	1.43247	1.44484
	16.3333	1.46082	1.43218	1.44563
	16.4167	1.46119	1.43297	1.44528
	16.5	1.45955	1.43254	1.4455
	16.5833	1.46113	1.43236	1.44508
	16.6667	1.46159	1.43269	1.4453
	16.75	1.4619	1.43353	1.44561
	16.8333	1.46079	1.43285	1.44531
	16.9167	1.46087	1.43224	1.44464
	17	1.46089	1.4322	1.44577
	17.0833	1.46089	1.4326	1.44456
	17.1667	1.46066	1.43374	1.44527
	17.25	1.46123	1.43219	1.44475
	17.3333	1.46053	1.43261	1.44525
	17.4167	1.46087	1.4331	1.44534
	17.5	1.46116	1.43322	1.44545
	17.5833	1.46096	1.43185	1.44527
	17.6667	1.46094	1.43339	1.44473
	17.75	1.46124	1.43255	1.44565
	17.8333	1.46079	1.43276	1.44526
	17.9167	1.46075	1.43262	1.4448
	18	1.46036	1.43224	1.44557
	18.0833	1.4612	1.43206	1.44506
	18.1667	1.46018	1.4323	1.44536
	18.25	1.46199	1.43414	1.44476
	18.3333	1.46121	1.43253	1.44521
	18.4167	1.46086	1.43231	1.44511
	18.5	1.46103	1.43274	1.44544
	18.5833	1.46052	1.43255	1.44612
	18.6667	1.45994	1.43315	1.44556
	18.75	1.46101	1.43261	1.44567
	18.8333	1.45989	1.43244	1.44536
	18.9167	1.46032	1.43215	1.44503
	19	1.46168	1.43188	1.44603
	19.0833	1.46057	1.43255	1.44613
	19.1667	1.46092	1.43136	1.44538
	19.25	1.46087	1.4332	1.44395
	19.3333	1.4602	1.43211	1.44529
	19.4167	1.46098	1.43228	1.44551
	19.5	1.46065	1.43331	1.44556
	19.5833	1.45978	1.43266	1.44583
	19.6667	1.46012	1.43254	1.44589
	19.75	1.4609	1.43206	1.44502
	19.8333	1.46175	1.43269	1.44515
	19.9167	1.46045	1.43272	1.44559
	20	1.46168	1.4331	1.44556

## Sheet: Figure5_source_5
	Time (min)	Abs 340 nm Replica 1	Abs 340 nmReplica 2	Abs 340 nmReplica 3	Abs 340 nm Replica 4			Equation linear regression trendline	R²
SAMPLE: His-RUVBL1-RUVBL2 + DHX34_D279A	0	1.44206	1.403	1.39364	1.42697		Replica 1	y = -0,0012x + 1,4804	R² = 0,9885
	0.0833333	1.44186	1.4022	1.39352	1.42753		Replica 2	y = -0,0011x + 1,4356	R² = 0,9916
	0.166667	1.44205	1.40212	1.39312	1.42802		Replica 3	y = -0,0006x + 1,411	R² = 0,9816
	0.25	1.44148	1.4024	1.39379	1.42731		Replica 4	y = -0,0006x + 1,4457	R² = 0,9777
	0.333333	1.44086	1.40187	1.39331	1.42785
	0.416667	1.44171	1.4011	1.39336	1.42806
	0.5	1.44124	1.40175	1.39345	1.42729
	0.583333	1.44101	1.40132	1.39283	1.42759
	0.666667	1.44133	1.40171	1.39267	1.42719
	0.75	1.44112	1.40255	1.39327	1.42804
	0.833333	1.44144	1.40245	1.39283	1.42802
	0.916667	1.44185	1.4005	1.39323	1.42695
	1	1.4412	1.40069	1.39301	1.42722
	1.08333	1.44095	1.40081	1.39366	1.42686
	1.16667	1.44096	1.40123	1.39338	1.42619
	1.25	1.44041	1.40096	1.39253	1.42656
	1.33333	1.4415	1.40041	1.39281	1.42656
	1.41667	1.44125	1.40008	1.3924	1.42728
	1.5	1.44078	1.40068	1.393	1.42776
	1.58333	1.44122	1.40031	1.39302	1.42761
	1.66667	1.44011	1.40001	1.39231	1.42639
	1.75	1.44099	1.40094	1.39244	1.4257
	1.83333	1.44066	1.40096	1.39249	1.42617
	1.91667	1.44015	1.40029	1.39233	1.42621
	2	1.43937	1.40081	1.39225	1.42653
	2.08333	1.44016	1.39963	1.39261	1.42653
	2.16667	1.44038	1.39958	1.39269	1.42725
	2.25	1.44015	1.39984	1.3926	1.42738
	2.33333	1.43935	1.39957	1.39205	1.42578
	2.41667	1.43955	1.39986	1.39195	1.42623
	2.5	1.43964	1.40041	1.3921	1.42596
	2.58333	1.43918	1.39976	1.39223	1.42635
	2.66667	1.43939	1.39931	1.39231	1.42563
	2.75	1.43928	1.39967	1.39212	1.42653
	2.83333	1.43935	1.39949	1.3922	1.4264
	2.91667	1.43936	1.39952	1.39275	1.42627
	3	1.43773	1.3996	1.39206	1.42694
	3.08333	1.43884	1.3989	1.39108	1.42563
	3.16667	1.43922	1.39958	1.39188	1.42719
	3.25	1.43861	1.39903	1.39267	1.42583
	3.33333	1.43919	1.39889	1.39145	1.42563
	3.41667	1.43854	1.39796	1.39213	1.42641
	3.5	1.43819	1.39888	1.39144	1.42549
	3.58333	1.43796	1.39931	1.39143	1.42554
	3.66667	1.4397	1.39831	1.39196	1.42504
	3.75	1.43834	1.39972	1.39137	1.42474
	3.83333	1.43905	1.39937	1.39096	1.42579
	3.91667	1.43786	1.39868	1.39224	1.42518
	4	1.4385	1.39833	1.39121	1.42467
	4.08333	1.43847	1.39842	1.39103	1.42541
	4.16667	1.43888	1.39796	1.39082	1.42625
	4.25	1.43729	1.39833	1.39187	1.42505
	4.33333	1.43718	1.39794	1.39146	1.42561
	4.41667	1.43775	1.3978	1.39126	1.42502
	4.5	1.43798	1.39783	1.39188	1.42533
	4.58333	1.43791	1.39724	1.39239	1.42535
	4.66667	1.43788	1.39782	1.39161	1.42464
	4.75	1.43678	1.3976	1.39099	1.42533
	4.83333	1.43671	1.39725	1.39142	1.42534
	4.91667	1.43722	1.39755	1.39066	1.42481
	5	1.4363	1.39876	1.39046	1.42517
	5.08333	1.43584	1.39717	1.39059	1.42532
	5.16667	1.43682	1.39728	1.39073	1.42484
	5.25	1.43665	1.39588	1.39089	1.4246
	5.33333	1.43671	1.39669	1.39054	1.42491
	5.41667	1.43679	1.39668	1.38986	1.4237
	5.5	1.43659	1.39637	1.39157	1.42441
	5.58333	1.4361	1.39709	1.39029	1.42506
	5.66667	1.43613	1.39741	1.3909	1.42484
	5.75	1.43589	1.3973	1.39039	1.42461
	5.83333	1.43617	1.39647	1.39152	1.42467
	5.91667	1.43612	1.39616	1.39	1.42487
	6	1.43603	1.3969	1.39093	1.42445
	6.08333	1.43648	1.39688	1.39008	1.42405
	6.16667	1.43578	1.39701	1.39028	1.4246
	6.25	1.43497	1.39601	1.39052	1.42366
	6.33333	1.43574	1.39658	1.39031	1.42476
	6.41667	1.4362	1.39604	1.39075	1.42451
	6.5	1.43627	1.39527	1.38987	1.42404
	6.58333	1.43604	1.39591	1.38946	1.42369
	6.66667	1.43485	1.39584	1.39014	1.42302
	6.75	1.43406	1.39612	1.39061	1.42463
	6.83333	1.43476	1.39573	1.39088	1.42461
	6.91667	1.43567	1.39506	1.38996	1.42429
	7	1.43493	1.39553	1.38982	1.42314
	7.08333	1.43448	1.39541	1.38915	1.42399
	7.16667	1.43437	1.39522	1.39032	1.42386
	7.25	1.43452	1.3952	1.39012	1.42338
	7.33333	1.43469	1.39595	1.38959	1.42315
	7.41667	1.43367	1.39502	1.39012	1.4243
	7.5	1.43458	1.39459	1.38952	1.42321
	7.58333	1.43492	1.39503	1.38927	1.42403
	7.66667	1.4339	1.39386	1.39044	1.42344
	7.75	1.43371	1.39392	1.38913	1.4237
	7.83333	1.43383	1.39419	1.38965	1.42371
	7.91667	1.43369	1.39381	1.38899	1.42384
	8	1.43305	1.39495	1.38971	1.424
	8.08333	1.43311	1.394	1.38949	1.42331
	8.16667	1.43328	1.39422	1.389	1.42239
	8.25	1.43341	1.3945	1.38924	1.42242
	8.33333	1.43391	1.39412	1.38829	1.42305
	8.41667	1.43351	1.39424	1.38848	1.42256
	8.5	1.43253	1.3928	1.38896	1.4233
	8.58333	1.43298	1.39419	1.38859	1.42258
	8.66667	1.43258	1.3939	1.38808	1.42287
	8.75	1.43318	1.39286	1.38947	1.42394
	8.83333	1.43439	1.39477	1.3901	1.42371
	8.91667	1.43249	1.39369	1.38832	1.42349
	9	1.43289	1.39294	1.38853	1.42236
	9.08333	1.4328	1.39353	1.38823	1.42262
	9.16667	1.4325	1.39418	1.3886	1.42211
	9.25	1.43238	1.39316	1.38877	1.4223
	9.33333	1.43197	1.39375	1.38852	1.42249
	9.41667	1.43227	1.39259	1.38837	1.42308
	9.5	1.43132	1.39268	1.3889	1.42275
	9.58333	1.4324	1.39228	1.38814	1.42264
	9.66667	1.43165	1.39249	1.38904	1.42295
	9.75	1.43165	1.3924	1.38827	1.42234
	9.83333	1.43189	1.39217	1.38889	1.42217
	9.91667	1.43175	1.39273	1.3876	1.42248
	10	1.43165	1.39245	1.38786	1.42267
	10.0833	1.4309	1.39127	1.38759	1.422
	10.1667	1.43096	1.39274	1.38803	1.4223
	10.25	1.43026	1.39213	1.38765	1.42159
	10.3333	1.43079	1.39197	1.38824	1.42189
	10.4167	1.43055	1.39166	1.38719	1.42187
	10.5	1.43042	1.39194	1.38692	1.42203
	10.5833	1.4306	1.39155	1.3872	1.42279
	10.6667	1.43043	1.39103	1.38664	1.42176
	10.75	1.4307	1.39072	1.38791	1.42219
	10.8333	1.43045	1.39177	1.38692	1.42241
	10.9167	1.43071	1.39052	1.38748	1.42197
	11	1.42972	1.39042	1.3871	1.4216
	11.0833	1.42967	1.39115	1.38755	1.42136
	11.1667	1.42994	1.39089	1.38737	1.42123
	11.25	1.42999	1.39073	1.38699	1.42194
	11.3333	1.43022	1.39109	1.38787	1.42176
	11.4167	1.43051	1.39081	1.38691	1.4205
	11.5	1.43032	1.39089	1.38732	1.42114
	11.5833	1.42873	1.3909	1.38699	1.421
	11.6667	1.42952	1.39058	1.38725	1.4213
	11.75	1.42961	1.38938	1.38713	1.42034
	11.8333	1.42856	1.38971	1.38763	1.42043
	11.9167	1.43012	1.39007	1.38733	1.42081
	12	1.42909	1.39094	1.38671	1.42046
	12.0833	1.42808	1.39018	1.38707	1.42058
	12.1667	1.42933	1.3893	1.38589	1.42187
	12.25	1.42803	1.38969	1.38679	1.42095
	12.3333	1.42874	1.3892	1.38685	1.42152
	12.4167	1.42834	1.38905	1.38703	1.42129
	12.5	1.42894	1.38922	1.3863	1.42058
	12.5833	1.42782	1.38961	1.38667	1.42023
	12.6667	1.42914	1.38811	1.38604	1.42038
	12.75	1.4279	1.38928	1.38701	1.42056
	12.8333	1.42783	1.3894	1.38608	1.42016
	12.9167	1.42779	1.38889	1.38668	1.42111
	13	1.42798	1.38845	1.3862	1.42034
	13.0833	1.42834	1.38815	1.38657	1.42016
	13.1667	1.42722	1.38826	1.38632	1.41955
	13.25	1.4273	1.38786	1.38583	1.42114
	13.3333	1.42828	1.38925	1.38575	1.42075
	13.4167	1.42657	1.38922	1.38608	1.42014
	13.5	1.42701	1.38842	1.38587	1.41948
	13.5833	1.42671	1.38776	1.38565	1.41955
	13.6667	1.42673	1.38789	1.38649	1.42024
	13.75	1.42668	1.38772	1.38602	1.41942
	13.8333	1.42719	1.38838	1.38555	1.42
	13.9167	1.42615	1.38762	1.38555	1.42073
	14	1.42679	1.38773	1.38547	1.42028
	14.0833	1.42627	1.38786	1.38571	1.41977
	14.1667	1.42627	1.38797	1.38595	1.41955
	14.25	1.42464	1.38724	1.38496	1.4195
	14.3333	1.42622	1.38736	1.38613	1.41957
	14.4167	1.42505	1.38759	1.3858	1.41961
	14.5	1.4256	1.38688	1.38553	1.41913
	14.5833	1.42552	1.38742	1.38527	1.41923
	14.6667	1.4259	1.38682	1.3853	1.41894
	14.75	1.42547	1.38677	1.38562	1.41974
	14.8333	1.42469	1.3879	1.38474	1.41911
	14.9167	1.42443	1.3866	1.38455	1.41907
	15	1.42453	1.38624	1.38621	1.41874
	15.0833	1.42428	1.38619	1.38546	1.41925
	15.1667	1.4242	1.38683	1.38514	1.41947
	15.25	1.42442	1.38681	1.38403	1.41947
	15.3333	1.42439	1.38632	1.38593	1.41805
	15.4167	1.4238	1.38633	1.38533	1.41962
	15.5	1.42416	1.38506	1.3848	1.41911
	15.5833	1.4233	1.38623	1.38433	1.41913
	15.6667	1.424	1.38547	1.38459	1.41883
	15.75	1.42338	1.38575	1.38503	1.41789
	15.8333	1.42383	1.38585	1.38497	1.41955
	15.9167	1.42254	1.38617	1.38517	1.41823
	16	1.423	1.38608	1.38375	1.41848
	16.0833	1.42293	1.38575	1.38442	1.41795
	16.1667	1.42294	1.38503	1.38434	1.41861
	16.25	1.42318	1.3854	1.38361	1.41814
	16.3333	1.42194	1.38535	1.38339	1.41846
	16.4167	1.42233	1.38504	1.38444	1.41794
	16.5	1.42291	1.38476	1.38412	1.41877
	16.5833	1.42245	1.3842	1.38415	1.41812
	16.6667	1.4222	1.38371	1.3842	1.41814
	16.75	1.42249	1.38418	1.38388	1.41839
	16.8333	1.42198	1.38371	1.38408	1.41741
	16.9167	1.42095	1.38338	1.38463	1.41814
	17	1.42123	1.38385	1.38398	1.41759
	17.0833	1.42198	1.38451	1.38378	1.41745
	17.1667	1.4222	1.38384	1.38377	1.41787
	17.25	1.42158	1.38394	1.38378	1.41808
	17.3333	1.42153	1.38303	1.3835	1.41734
	17.4167	1.42197	1.3839	1.38297	1.41863
	17.5	1.42024	1.38337	1.38331	1.41749
	17.5833	1.42127	1.38261	1.38384	1.41659
	17.6667	1.42152	1.38352	1.38355	1.41708
	17.75	1.42054	1.38268	1.3841	1.41606
	17.8333	1.421	1.38274	1.3833	1.41682
	17.9167	1.42032	1.38233	1.38345	1.41758
	18	1.41993	1.38323	1.38287	1.41767
	18.0833	1.42048	1.38353	1.38241	1.41777
	18.1667	1.41981	1.38264	1.38305	1.41626
	18.25	1.41874	1.38232	1.38268	1.41661
	18.3333	1.4195	1.38289	1.38336	1.41676
	18.4167	1.41965	1.3831	1.38397	1.41668
	18.5	1.41832	1.38307	1.38352	1.41713
	18.5833	1.42063	1.38096	1.38379	1.41596
	18.6667	1.41868	1.38228	1.38187	1.41691
	18.75	1.4185	1.38175	1.38283	1.41492
	18.8333	1.41939	1.38203	1.38258	1.41734
	18.9167	1.41893	1.38148	1.38296	1.41709
	19	1.41891	1.38163	1.38301	1.41614
	19.0833	1.4182	1.38159	1.38295	1.41599
	19.1667	1.41794	1.38117	1.38275	1.41647
	19.25	1.41837	1.38154	1.38247	1.41649
	19.3333	1.41793	1.38146	1.38262	1.41686
	19.4167	1.41659	1.38037	1.38237	1.4161
	19.5	1.41752	1.3814	1.38224	1.416
	19.5833	1.41821	1.37998	1.38219	1.4162
	19.6667	1.41733	1.3801	1.38228	1.4164
	19.75	1.41702	1.37966	1.38335	1.41543
	19.8333	1.41795	1.3806	1.38265	1.41606
	19.9167	1.41728	1.38064	1.38297	1.4161
	20	1.4172	1.38036	1.38271	1.41547

## Sheet: Figure5_source_6
	Time (min)	Abs 340 nm Replica 1	Abs 340 nmReplica 2	Abs 340 nmReplica 3		Equation linear regression trendline	R²
His-RUVBL1_RUVBL2_E300Q + DHX34_D279A	0	1.50963	1.41375	1.44319	Replica 1	y = -0,0007x + 1,5315	R² = 0,985
	0.0833333	1.50974	1.41383	1.44292	Replica 2	y = -0,0007x + 1,4346	R² = 0,986
	0.166667	1.50969	1.41283	1.44217	Replica 3	y = -0,0004x + 1,4562	R² = 0,9638
	0.25	1.51044	1.41324	1.44229
	0.333333	1.50958	1.41311	1.44152
	0.416667	1.50907	1.41297	1.44311
	0.5	1.50916	1.41357	1.44235
	0.583333	1.50887	1.41357	1.44236
	0.666667	1.50927	1.41342	1.44254
	0.75	1.50879	1.41234	1.44194
	0.833333	1.51047	1.41232	1.44269
	0.916667	1.50848	1.41354	1.44241
	1	1.50829	1.41292	1.4429
	1.08333	1.50885	1.4125	1.44218
	1.16667	1.50801	1.41223	1.44338
	1.25	1.50948	1.41193	1.44187
	1.33333	1.50847	1.41234	1.44241
	1.41667	1.50874	1.41249	1.44292
	1.5	1.50836	1.41243	1.44266
	1.58333	1.50821	1.41284	1.44246
	1.66667	1.50812	1.41238	1.44161
	1.75	1.50805	1.41293	1.44259
	1.83333	1.50867	1.41262	1.44171
	1.91667	1.50806	1.41209	1.44182
	2	1.50768	1.41269	1.44205
	2.08333	1.50736	1.41175	1.44135
	2.16667	1.50715	1.41223	1.44115
	2.25	1.50772	1.41212	1.44173
	2.33333	1.50845	1.4126	1.44157
	2.41667	1.50747	1.41144	1.44229
	2.5	1.50755	1.41183	1.44145
	2.58333	1.5072	1.41193	1.44229
	2.66667	1.50716	1.41262	1.44232
	2.75	1.50849	1.41241	1.4411
	2.83333	1.50668	1.41192	1.44095
	2.91667	1.50688	1.41188	1.44145
	3	1.50753	1.41203	1.44132
	3.08333	1.50686	1.41196	1.4412
	3.16667	1.50846	1.41183	1.44126
	3.25	1.50593	1.41179	1.44199
	3.33333	1.50672	1.41152	1.44143
	3.41667	1.50676	1.41186	1.44125
	3.5	1.50699	1.4116	1.44096
	3.58333	1.50657	1.41129	1.442
	3.66667	1.50592	1.41173	1.4417
	3.75	1.50644	1.41135	1.44072
	3.83333	1.50665	1.4111	1.44062
	3.91667	1.50688	1.41058	1.44094
	4	1.50739	1.4109	1.44242
	4.08333	1.50656	1.41127	1.43936
	4.16667	1.50734	1.41043	1.44141
	4.25	1.50637	1.41067	1.44092
	4.33333	1.50617	1.41071	1.44134
	4.41667	1.50534	1.41071	1.44043
	4.5	1.50617	1.41153	1.44116
	4.58333	1.50586	1.41073	1.44027
	4.66667	1.50571	1.41	1.44121
	4.75	1.50546	1.41037	1.44143
	4.83333	1.50519	1.41038	1.44074
	4.91667	1.50609	1.40994	1.44059
	5	1.50666	1.41027	1.4404
	5.08333	1.5048	1.41074	1.43949
	5.16667	1.50569	1.4107	1.44093
	5.25	1.50537	1.41005	1.44112
	5.33333	1.50524	1.41006	1.43912
	5.41667	1.50563	1.40992	1.441
	5.5	1.50509	1.41035	1.44047
	5.58333	1.5049	1.41026	1.44014
	5.66667	1.50588	1.41064	1.4409
	5.75	1.50509	1.40969	1.44002
	5.83333	1.50465	1.41054	1.44062
	5.91667	1.50543	1.40989	1.44014
	6	1.50453	1.40972	1.4407
	6.08333	1.5049	1.40903	1.4396
	6.16667	1.50441	1.40868	1.4399
	6.25	1.50449	1.40969	1.43984
	6.33333	1.5049	1.40978	1.43927
	6.41667	1.50456	1.40916	1.44072
	6.5	1.50395	1.40944	1.44049
	6.58333	1.50439	1.40924	1.44078
	6.66667	1.50569	1.40874	1.43999
	6.75	1.50457	1.40959	1.43948
	6.83333	1.50509	1.40815	1.44067
	6.91667	1.50373	1.40919	1.43979
	7	1.50544	1.40869	1.43943
	7.08333	1.50456	1.40889	1.44027
	7.16667	1.50468	1.40881	1.43991
	7.25	1.50397	1.40945	1.44
	7.33333	1.50473	1.40879	1.43976
	7.41667	1.50509	1.40831	1.43925
	7.5	1.50427	1.40919	1.43948
	7.58333	1.50369	1.40869	1.43876
	7.66667	1.504	1.40784	1.43932
	7.75	1.50259	1.4088	1.44035
	7.83333	1.5036	1.40845	1.44002
	7.91667	1.5032	1.40869	1.43981
	8	1.5036	1.40908	1.43859
	8.08333	1.50327	1.40885	1.43822
	8.16667	1.50396	1.40864	1.44026
	8.25	1.50369	1.40797	1.44026
	8.33333	1.50343	1.40915	1.43936
	8.41667	1.50325	1.40829	1.43986
	8.5	1.50353	1.40866	1.43945
	8.58333	1.50397	1.4077	1.43853
	8.66667	1.5025	1.40795	1.43841
	8.75	1.50305	1.40787	1.4392
	8.83333	1.5029	1.40877	1.43909
	8.91667	1.50273	1.4076	1.43904
	9	1.50262	1.40805	1.439
	9.08333	1.50273	1.40726	1.43956
	9.16667	1.50259	1.40775	1.4391
	9.25	1.50252	1.40745	1.43958
	9.33333	1.50314	1.40841	1.43835
	9.41667	1.50241	1.40716	1.43913
	9.5	1.50302	1.40765	1.43823
	9.58333	1.50243	1.4074	1.43913
	9.66667	1.5025	1.4077	1.43864
	9.75	1.50223	1.4072	1.43896
	9.83333	1.50251	1.4074	1.43804
	9.91667	1.50173	1.40738	1.43864
	10	1.50274	1.40751	1.43926
	10.0833	1.50193	1.40721	1.43908
	10.1667	1.50192	1.40663	1.43794
	10.25	1.50166	1.40739	1.43903
	10.3333	1.50243	1.40645	1.43825
	10.4167	1.50215	1.40686	1.43825
	10.5	1.50201	1.40627	1.43837
	10.5833	1.50166	1.40736	1.4389
	10.6667	1.50239	1.40557	1.43812
	10.75	1.50089	1.40645	1.43878
	10.8333	1.50134	1.40665	1.43856
	10.9167	1.50169	1.40603	1.43877
	11	1.50154	1.40643	1.43769
	11.0833	1.50082	1.40561	1.43706
	11.1667	1.50197	1.4065	1.43811
	11.25	1.50179	1.40669	1.43842
	11.3333	1.50127	1.40617	1.43816
	11.4167	1.5026	1.40669	1.43822
	11.5	1.50105	1.40616	1.43794
	11.5833	1.50113	1.40567	1.43757
	11.6667	1.50081	1.40575	1.43753
	11.75	1.50101	1.40618	1.43685
	11.8333	1.50036	1.40626	1.43722
	11.9167	1.50176	1.40579	1.43767
	12	1.50088	1.40688	1.43768
	12.0833	1.49958	1.40618	1.43768
	12.1667	1.50153	1.4056	1.43712
	12.25	1.49997	1.40631	1.43776
	12.3333	1.50039	1.40554	1.43702
	12.4167	1.49976	1.40504	1.43809
	12.5	1.50061	1.40602	1.43841
	12.5833	1.50059	1.40443	1.43748
	12.6667	1.49961	1.40484	1.43793
	12.75	1.50032	1.40413	1.43789
	12.8333	1.49991	1.40499	1.43727
	12.9167	1.4994	1.40497	1.43698
	13	1.50033	1.40512	1.43736
	13.0833	1.5001	1.40495	1.43699
	13.1667	1.49914	1.40495	1.43704
	13.25	1.49921	1.40547	1.43674
	13.3333	1.4991	1.40431	1.43656
	13.4167	1.50027	1.40476	1.43715
	13.5	1.49975	1.40459	1.43672
	13.5833	1.49956	1.40404	1.43662
	13.6667	1.49928	1.40456	1.43764
	13.75	1.4996	1.40452	1.43683
	13.8333	1.49962	1.40408	1.43745
	13.9167	1.49807	1.40345	1.43677
	14	1.49908	1.40425	1.43681
	14.0833	1.49847	1.40494	1.43632
	14.1667	1.49806	1.40386	1.43657
	14.25	1.49842	1.40473	1.43678
	14.3333	1.49857	1.40421	1.43662
	14.4167	1.49792	1.40378	1.43645
	14.5	1.49843	1.40387	1.43597
	14.5833	1.49835	1.4027	1.43666
	14.6667	1.49749	1.40381	1.43621
	14.75	1.49868	1.40336	1.43689
	14.8333	1.49897	1.404	1.43699
	14.9167	1.49731	1.40282	1.43655
	15	1.49869	1.4029	1.43617
	15.0833	1.49857	1.40459	1.43709
	15.1667	1.49885	1.40357	1.43567
	15.25	1.49893	1.40414	1.43567
	15.3333	1.49794	1.40381	1.4358
	15.4167	1.49731	1.40386	1.43729
	15.5	1.49877	1.40337	1.4367
	15.5833	1.49891	1.40257	1.43569
	15.6667	1.4979	1.4031	1.43576
	15.75	1.4986	1.40288	1.43552
	15.8333	1.49726	1.40302	1.4359
	15.9167	1.4976	1.40251	1.43597
	16	1.49853	1.40277	1.43622
	16.0833	1.49827	1.40267	1.43596
	16.1667	1.49769	1.40325	1.43601
	16.25	1.49687	1.40242	1.43508
	16.3333	1.49768	1.40292	1.43506
	16.4167	1.49684	1.40305	1.43608
	16.5	1.49698	1.40322	1.4356
	16.5833	1.49715	1.40249	1.43559
	16.6667	1.49766	1.40259	1.43569
	16.75	1.49717	1.4022	1.43623
	16.8333	1.49712	1.4025	1.43477
	16.9167	1.49686	1.40315	1.43566
	17	1.49803	1.40154	1.43473
	17.0833	1.49732	1.40191	1.43542
	17.1667	1.49643	1.40204	1.43545
	17.25	1.49707	1.40203	1.43502
	17.3333	1.49751	1.40187	1.43536
	17.4167	1.4966	1.40149	1.43545
	17.5	1.49704	1.40146	1.43542
	17.5833	1.49673	1.40154	1.43428
	17.6667	1.49524	1.40143	1.43459
	17.75	1.49673	1.40194	1.43475
	17.8333	1.49702	1.40158	1.43517
	17.9167	1.49615	1.40078	1.43467
	18	1.49651	1.40066	1.43517
	18.0833	1.49646	1.40117	1.4348
	18.1667	1.49589	1.40085	1.43431
	18.25	1.49592	1.40077	1.43499
	18.3333	1.49673	1.40079	1.43452
	18.4167	1.4963	1.40046	1.43393
	18.5	1.49578	1.40171	1.43455
	18.5833	1.49585	1.40079	1.43424
	18.6667	1.49599	1.40057	1.43533
	18.75	1.49528	1.4011	1.43437
	18.8333	1.49554	1.40105	1.43401
	18.9167	1.49567	1.39965	1.43374
	19	1.49532	1.39963	1.43424
	19.0833	1.49542	1.39983	1.4351
	19.1667	1.49548	1.39999	1.43464
	19.25	1.49512	1.40041	1.43371
	19.3333	1.49505	1.39948	1.43368
	19.4167	1.49493	1.39982	1.43425
	19.5	1.49484	1.40008	1.43434
	19.5833	1.49475	1.39985	1.43407
	19.6667	1.49616	1.39952	1.43411
	19.75	1.49557	1.39956	1.43414
	19.8333	1.49477	1.4	1.4334
	19.9167	1.49599	1.39966	1.43398
	20	1.49453	1.3996	1.43432

## Sheet: Figure5_source_7
	Time (min)	Abs 340 nm Replica 1	Abs 340 nmReplica 2	Abs 340 nmReplica 3		Equation linear regression trendline	R²
His-RUVBL1_E303Q_RUVBL2 + DHX34_D279A	0	1.38717	1.44546	1.44464	Replica 1	y = -0,0002x + 1,3936	R² = 0,8347
	0.0833333	1.38739	1.44572	1.44518	Replica 2	y = -0,0001x + 1,4491	R² = 0,6371
	0.166667	1.38798	1.44511	1.44481	Replica 3	y = -0,0001x + 1,4492	R² = 0,7491
	0.25	1.38749	1.44592	1.44499
	0.333333	1.38879	1.44596	1.44499
	0.416667	1.38845	1.44554	1.44414
	0.5	1.38837	1.44554	1.44566
	0.583333	1.38715	1.44492	1.44445
	0.666667	1.38829	1.44537	1.44491
	0.75	1.38836	1.44467	1.44486
	0.833333	1.38688	1.44576	1.44435
	0.916667	1.38751	1.44577	1.44428
	1	1.38847	1.44544	1.4445
	1.08333	1.38793	1.44538	1.44449
	1.16667	1.38718	1.44453	1.44456
	1.25	1.3882	1.44482	1.44445
	1.33333	1.38802	1.4455	1.44496
	1.41667	1.38746	1.44636	1.44498
	1.5	1.3887	1.44615	1.44439
	1.58333	1.38725	1.44481	1.44508
	1.66667	1.38801	1.44576	1.4448
	1.75	1.38808	1.44578	1.44454
	1.83333	1.38898	1.44498	1.44457
	1.91667	1.38861	1.44507	1.44514
	2	1.38793	1.44585	1.44458
	2.08333	1.38827	1.44547	1.44486
	2.16667	1.38791	1.44425	1.44484
	2.25	1.38764	1.44599	1.44481
	2.33333	1.38723	1.4454	1.4444
	2.41667	1.38794	1.44576	1.44442
	2.5	1.3872	1.44551	1.44484
	2.58333	1.38835	1.44468	1.44456
	2.66667	1.38813	1.44526	1.4441
	2.75	1.38737	1.44543	1.4437
	2.83333	1.38851	1.44485	1.44492
	2.91667	1.38789	1.4453	1.4451
	3	1.38735	1.44563	1.44474
	3.08333	1.388	1.44546	1.44451
	3.16667	1.38783	1.44538	1.44427
	3.25	1.38848	1.44582	1.44459
	3.33333	1.38759	1.44528	1.44444
	3.41667	1.38698	1.44493	1.44358
	3.5	1.38727	1.44505	1.44474
	3.58333	1.38729	1.44517	1.44399
	3.66667	1.38667	1.44431	1.44448
	3.75	1.38724	1.44597	1.44404
	3.83333	1.3878	1.44536	1.44473
	3.91667	1.38768	1.44539	1.44376
	4	1.38725	1.44559	1.44451
	4.08333	1.38728	1.44531	1.44404
	4.16667	1.38782	1.44591	1.44425
	4.25	1.38764	1.44517	1.44439
	4.33333	1.38719	1.44644	1.44448
	4.41667	1.38762	1.44514	1.44464
	4.5	1.38726	1.44559	1.44393
	4.58333	1.38668	1.44507	1.44435
	4.66667	1.38714	1.44508	1.44481
	4.75	1.38822	1.44391	1.44401
	4.83333	1.38699	1.44466	1.44401
	4.91667	1.38814	1.44542	1.44404
	5	1.38764	1.44504	1.44381
	5.08333	1.38719	1.44453	1.44477
	5.16667	1.38691	1.44508	1.44461
	5.25	1.38787	1.44458	1.44346
	5.33333	1.38775	1.44536	1.44445
	5.41667	1.38684	1.44574	1.44396
	5.5	1.38669	1.44456	1.44475
	5.58333	1.3868	1.44539	1.44466
	5.66667	1.38658	1.44514	1.44322
	5.75	1.38666	1.44454	1.44378
	5.83333	1.38679	1.44493	1.44367
	5.91667	1.38665	1.44497	1.44504
	6	1.38634	1.44564	1.44432
	6.08333	1.38726	1.4447	1.44406
	6.16667	1.38801	1.44423	1.44455
	6.25	1.38674	1.44424	1.44379
	6.33333	1.38696	1.44508	1.44437
	6.41667	1.38693	1.44463	1.44443
	6.5	1.38683	1.44436	1.4439
	6.58333	1.38723	1.44586	1.44328
	6.66667	1.38694	1.44477	1.44335
	6.75	1.38702	1.44506	1.44335
	6.83333	1.38678	1.44514	1.4437
	6.91667	1.38803	1.44419	1.44473
	7	1.38733	1.44509	1.4441
	7.08333	1.38649	1.44358	1.44361
	7.16667	1.38603	1.44528	1.44405
	7.25	1.38677	1.44376	1.44419
	7.33333	1.3874	1.445	1.44444
	7.41667	1.38757	1.44418	1.44409
	7.5	1.38675	1.44495	1.44365
	7.58333	1.38707	1.44433	1.4427
	7.66667	1.38716	1.4453	1.44332
	7.75	1.3879	1.44488	1.44338
	7.83333	1.38702	1.44365	1.44301
	7.91667	1.38805	1.44487	1.4438
	8	1.38639	1.4441	1.44396
	8.08333	1.38695	1.44427	1.44377
	8.16667	1.38639	1.44352	1.44389
	8.25	1.38701	1.44409	1.44307
	8.33333	1.38704	1.44489	1.44374
	8.41667	1.38645	1.44415	1.44446
	8.5	1.38626	1.44431	1.44376
	8.58333	1.3864	1.44443	1.44386
	8.66667	1.38647	1.44406	1.44372
	8.75	1.38722	1.44416	1.44231
	8.83333	1.3868	1.44317	1.44295
	8.91667	1.38612	1.44506	1.44332
	9	1.38622	1.4434	1.44434
	9.08333	1.38552	1.44444	1.44293
	9.16667	1.3865	1.44352	1.44403
	9.25	1.38652	1.4448	1.4431
	9.33333	1.38637	1.44413	1.4435
	9.41667	1.38615	1.44394	1.44383
	9.5	1.38668	1.44491	1.44229
	9.58333	1.38635	1.4445	1.44245
	9.66667	1.38682	1.44434	1.44286
	9.75	1.38614	1.44433	1.44384
	9.83333	1.38699	1.44389	1.44305
	9.91667	1.38696	1.44467	1.44372
	10	1.38688	1.44471	1.44265
	10.0833	1.3866	1.44468	1.44251
	10.1667	1.3871	1.44338	1.44308
	10.25	1.38638	1.44441	1.44296
	10.3333	1.38571	1.44416	1.44381
	10.4167	1.38637	1.44335	1.4424
	10.5	1.38695	1.44397	1.44294
	10.5833	1.38682	1.44341	1.44319
	10.6667	1.38596	1.44407	1.44321
	10.75	1.38713	1.44446	1.44331
	10.8333	1.3857	1.44369	1.44239
	10.9167	1.38631	1.4445	1.44307
	11	1.3865	1.4449	1.44392
	11.0833	1.38577	1.44368	1.44259
	11.1667	1.38649	1.44551	1.44208
	11.25	1.38684	1.44415	1.44357
	11.3333	1.38608	1.44421	1.44298
	11.4167	1.38648	1.4434	1.44323
	11.5	1.3859	1.4432	1.4432
	11.5833	1.38579	1.44373	1.44289
	11.6667	1.38554	1.44469	1.44294
	11.75	1.38595	1.44352	1.44384
	11.8333	1.38661	1.44393	1.44296
	11.9167	1.38613	1.44398	1.44228
	12	1.38666	1.44424	1.4428
	12.0833	1.38629	1.44404	1.44264
	12.1667	1.38568	1.44367	1.44347
	12.25	1.38618	1.44406	1.44263
	12.3333	1.38641	1.44465	1.44277
	12.4167	1.3861	1.44366	1.44267
	12.5	1.38585	1.44406	1.4429
	12.5833	1.38578	1.44313	1.44326
	12.6667	1.38603	1.44372	1.4422
	12.75	1.38598	1.4445	1.44308
	12.8333	1.38584	1.44357	1.4423
	12.9167	1.38512	1.44419	1.44347
	13	1.38612	1.44377	1.44246
	13.0833	1.38624	1.44458	1.44274
	13.1667	1.38557	1.44358	1.44259
	13.25	1.38604	1.44378	1.44361
	13.3333	1.38697	1.44474	1.44286
	13.4167	1.38591	1.44376	1.44273
	13.5	1.38624	1.4441	1.44346
	13.5833	1.38556	1.44433	1.44231
	13.6667	1.38547	1.4442	1.4426
	13.75	1.38568	1.44449	1.44335
	13.8333	1.38596	1.44348	1.44149
	13.9167	1.3855	1.44376	1.44225
	14	1.38505	1.44457	1.44246
	14.0833	1.38474	1.44363	1.44305
	14.1667	1.38593	1.44396	1.4422
	14.25	1.38484	1.44489	1.44317
	14.3333	1.38532	1.44482	1.44318
	14.4167	1.38552	1.4442	1.44262
	14.5	1.38613	1.44397	1.44268
	14.5833	1.38498	1.44436	1.443
	14.6667	1.38556	1.44447	1.44311
	14.75	1.38582	1.44381	1.44238
	14.8333	1.3855	1.44386	1.44226
	14.9167	1.38556	1.44414	1.44321
	15	1.38552	1.44413	1.44308
	15.0833	1.38529	1.44387	1.44223
	15.1667	1.38587	1.4438	1.44229
	15.25	1.38549	1.44306	1.44247
	15.3333	1.38577	1.44457	1.44395
	15.4167	1.38524	1.44419	1.44223
	15.5	1.38555	1.44339	1.44211
	15.5833	1.38478	1.44347	1.44235
	15.6667	1.38522	1.44443	1.4422
	15.75	1.38519	1.44469	1.44241
	15.8333	1.38511	1.44318	1.44229
	15.9167	1.38478	1.44327	1.44198
	16	1.38543	1.44423	1.44183
	16.0833	1.38508	1.44301	1.44158
	16.1667	1.38567	1.44452	1.44252
	16.25	1.38487	1.44416	1.44228
	16.3333	1.3855	1.44416	1.44367
	16.4167	1.38536	1.44418	1.44248
	16.5	1.3852	1.44333	1.44279
	16.5833	1.38516	1.44385	1.44261
	16.6667	1.38536	1.44393	1.4432
	16.75	1.38524	1.44429	1.44319
	16.8333	1.38557	1.44265	1.44299
	16.9167	1.38601	1.44394	1.442
	17	1.38549	1.44382	1.44295
	17.0833	1.38436	1.44305	1.44283
	17.1667	1.38516	1.44385	1.44193
	17.25	1.38478	1.443	1.44203
	17.3333	1.38527	1.44372	1.4424
	17.4167	1.38507	1.44362	1.44191
	17.5	1.38457	1.44367	1.44299
	17.5833	1.38557	1.44328	1.44226
	17.6667	1.38432	1.44264	1.44291
	17.75	1.38514	1.44361	1.44374
	17.8333	1.38494	1.44371	1.44203
	17.9167	1.38606	1.4443	1.44212
	18	1.38572	1.44348	1.44324
	18.0833	1.38416	1.44332	1.44167
	18.1667	1.3838	1.44342	1.44234
	18.25	1.38487	1.44337	1.44247
	18.3333	1.38477	1.44326	1.44227
	18.4167	1.38464	1.4443	1.44193
	18.5	1.38551	1.44352	1.44315
	18.5833	1.38468	1.44286	1.44136
	18.6667	1.38515	1.44299	1.44158
	18.75	1.38497	1.44435	1.44195
	18.8333	1.38472	1.44326	1.44224
	18.9167	1.38483	1.44305	1.44217
	19	1.38434	1.44377	1.44281
	19.0833	1.38446	1.44326	1.44211
	19.1667	1.38449	1.44343	1.44181
	19.25	1.38474	1.44359	1.44235
	19.3333	1.38489	1.44265	1.44224
	19.4167	1.38405	1.44299	1.44245
	19.5	1.38484	1.44385	1.44197
	19.5833	1.38376	1.44244	1.44226
	19.6667	1.38477	1.44234	1.44219
	19.75	1.38439	1.44275	1.44152
	19.8333	1.38491	1.44282	1.44252
	19.9167	1.38468	1.44295	1.44234
	20	1.38448	1.44309	1.44189

## Sheet: Figure5_S1_source_8
	Time (min)	Abs 340 nm Replica 1	Abs 340 nmReplica 2	Abs 340 nmReplica 3			Equation linear regression trendline	R²
DHX34 wt	0	1.47482	1.46148	1.4979		Replica 1	y = -0,0003x + 1,4836	R² = 0,9209
	0.0833333	1.47412	1.46024	1.49847		Replica 2	y = -0,0002x + 1,4648	R² = 0,7404
	0.166667	1.47424	1.46133	1.49949		Replica 3	y = -0,0002x + 1,5061	R² = 0,8841
	0.25	1.47521	1.45999	1.49746
	0.333333	1.47517	1.4604	1.49861
	0.416667	1.47409	1.46056	1.4986
	0.5	1.47419	1.45971	1.499
	0.583333	1.47363	1.45995	1.49725
	0.666667	1.47418	1.4609	1.49915
	0.75	1.47381	1.45992	1.49921
	0.833333	1.47433	1.46113	1.49911
	0.916667	1.47387	1.46109	1.49853
	1	1.47313	1.45959	1.49786
	1.08333	1.47306	1.46131	1.49758
	1.16667	1.47343	1.46021	1.49881
	1.25	1.47407	1.46053	1.49692
	1.33333	1.47339	1.45998	1.49866
	1.41667	1.47453	1.46012	1.49834
	1.5	1.47321	1.46031	1.49885
	1.58333	1.47375	1.46027	1.49912
	1.66667	1.4732	1.46002	1.49835
	1.75	1.47314	1.46	1.49773
	1.83333	1.47379	1.46023	1.49833
	1.91667	1.47303	1.4607	1.49854
	2	1.47371	1.46082	1.49829
	2.08333	1.47414	1.46052	1.49845
	2.16667	1.47358	1.45923	1.4982
	2.25	1.47368	1.4597	1.49905
	2.33333	1.4738	1.45986	1.49784
	2.41667	1.47322	1.46008	1.4972
	2.5	1.47394	1.46017	1.49809
	2.58333	1.4727	1.46033	1.4988
	2.66667	1.47358	1.45995	1.49835
	2.75	1.4736	1.45928	1.49807
	2.83333	1.47316	1.45953	1.49789
	2.91667	1.47338	1.45928	1.49756
	3	1.47326	1.45963	1.49715
	3.08333	1.47294	1.46028	1.49824
	3.16667	1.4719	1.45919	1.49741
	3.25	1.47405	1.459	1.49766
	3.33333	1.47298	1.45981	1.49824
	3.41667	1.47276	1.46004	1.49783
	3.5	1.47391	1.4594	1.49753
	3.58333	1.47264	1.45944	1.49772
	3.66667	1.4724	1.45889	1.49726
	3.75	1.47287	1.45991	1.49712
	3.83333	1.47278	1.45978	1.49765
	3.91667	1.47204	1.45931	1.49642
	4	1.47284	1.45968	1.49814
	4.08333	1.47322	1.46011	1.49681
	4.16667	1.47348	1.45933	1.49781
	4.25	1.47311	1.46005	1.49784
	4.33333	1.47271	1.45921	1.4973
	4.41667	1.47307	1.45988	1.49858
	4.5	1.47165	1.45964	1.49784
	4.58333	1.47346	1.45916	1.49688
	4.66667	1.47262	1.45997	1.49815
	4.75	1.47325	1.45897	1.49698
	4.83333	1.47273	1.45908	1.49783
	4.91667	1.47314	1.45883	1.49728
	5	1.47239	1.45984	1.49733
	5.08333	1.47253	1.45944	1.49808
	5.16667	1.47193	1.45931	1.49772
	5.25	1.47278	1.45978	1.49732
	5.33333	1.47351	1.45796	1.4972
	5.41667	1.47284	1.45855	1.49743
	5.5	1.47259	1.46002	1.49727
	5.58333	1.4718	1.45988	1.49736
	5.66667	1.4714	1.45942	1.49629
	5.75	1.47235	1.45936	1.49717
	5.83333	1.47182	1.45873	1.49729
	5.91667	1.47249	1.4588	1.4972
	6	1.47324	1.4587	1.49673
	6.08333	1.47179	1.45833	1.49805
	6.16667	1.47155	1.45886	1.49806
	6.25	1.47076	1.45875	1.49736
	6.33333	1.47225	1.45913	1.49653
	6.41667	1.47193	1.45988	1.49716
	6.5	1.47181	1.4579	1.49676
	6.58333	1.47184	1.45841	1.49601
	6.66667	1.4713	1.45903	1.49817
	6.75	1.47213	1.45937	1.49722
	6.83333	1.47192	1.45952	1.49686
	6.91667	1.4717	1.45834	1.49669
	7	1.47176	1.45892	1.49696
	7.08333	1.47231	1.45873	1.49628
	7.16667	1.47221	1.45835	1.49715
	7.25	1.47223	1.4594	1.49643
	7.33333	1.47189	1.45981	1.49774
	7.41667	1.47107	1.45873	1.49684
	7.5	1.4721	1.45833	1.4968
	7.58333	1.4719	1.45877	1.49741
	7.66667	1.47291	1.45841	1.49683
	7.75	1.47201	1.45871	1.49629
	7.83333	1.47196	1.45837	1.49612
	7.91667	1.4714	1.45809	1.49661
	8	1.47221	1.45873	1.49674
	8.08333	1.47173	1.45795	1.49627
	8.16667	1.47263	1.45859	1.49638
	8.25	1.47093	1.45926	1.49709
	8.33333	1.47062	1.45901	1.49709
	8.41667	1.47119	1.45925	1.49587
	8.5	1.47153	1.45832	1.49621
	8.58333	1.47133	1.45813	1.49627
	8.66667	1.47179	1.45895	1.49685
	8.75	1.47114	1.4581	1.49665
	8.83333	1.4708	1.45842	1.49647
	8.91667	1.47124	1.45828	1.49638
	9	1.47126	1.4577	1.49577
	9.08333	1.47071	1.45908	1.4959
	9.16667	1.47066	1.45871	1.49561
	9.25	1.47134	1.45867	1.49671
	9.33333	1.47082	1.45886	1.49677
	9.41667	1.47085	1.45855	1.496
	9.5	1.47182	1.45823	1.49706
	9.58333	1.4711	1.45794	1.49612
	9.66667	1.47023	1.45844	1.49734
	9.75	1.4704	1.45884	1.49618
	9.83333	1.47155	1.45846	1.4963
	9.91667	1.47076	1.4588	1.49608
	10	1.47048	1.45885	1.4954
	10.0833	1.47084	1.45873	1.49529
	10.1667	1.47065	1.45931	1.49588
	10.25	1.47076	1.45823	1.49548
	10.3333	1.47117	1.45797	1.49511
	10.4167	1.46993	1.45823	1.49551
	10.5	1.47042	1.45996	1.49575
	10.5833	1.47091	1.45894	1.49589
	10.6667	1.47013	1.45847	1.49568
	10.75	1.47013	1.45873	1.49622
	10.8333	1.47014	1.45814	1.49526
	10.9167	1.47022	1.45892	1.49618
	11	1.47106	1.45878	1.49599
	11.0833	1.47223	1.45901	1.4966
	11.1667	1.47026	1.45834	1.49553
	11.25	1.47106	1.4589	1.49556
	11.3333	1.47097	1.4587	1.49591
	11.4167	1.47	1.45798	1.49549
	11.5	1.46959	1.45737	1.49544
	11.5833	1.4711	1.45878	1.49555
	11.6667	1.4708	1.45842	1.49634
	11.75	1.47043	1.45726	1.49557
	11.8333	1.46978	1.4581	1.49611
	11.9167	1.47105	1.45862	1.49673
	12	1.47127	1.45812	1.49509
	12.0833	1.47044	1.45723	1.49665
	12.1667	1.47031	1.45805	1.49616
	12.25	1.47007	1.45856	1.4955
	12.3333	1.47079	1.45883	1.4957
	12.4167	1.46981	1.45816	1.49547
	12.5	1.46948	1.45741	1.49584
	12.5833	1.47018	1.45854	1.49545
	12.6667	1.469	1.45906	1.49521
	12.75	1.47031	1.45926	1.49538
	12.8333	1.46914	1.45776	1.4961
	12.9167	1.46998	1.45768	1.49451
	13	1.46981	1.45875	1.49488
	13.0833	1.46921	1.45746	1.49534
	13.1667	1.47018	1.45798	1.49538
	13.25	1.46984	1.45824	1.49544
	13.3333	1.47006	1.458	1.49505
	13.4167	1.47017	1.4574	1.49534
	13.5	1.46945	1.45755	1.4944
	13.5833	1.47017	1.45817	1.49448
	13.6667	1.47041	1.45943	1.49517
	13.75	1.46973	1.45838	1.4958
	13.8333	1.46893	1.4576	1.49539
	13.9167	1.46982	1.45794	1.49432
	14	1.46953	1.45822	1.49488
	14.0833	1.47002	1.45883	1.4951
	14.1667	1.46997	1.45796	1.49553
	14.25	1.46937	1.45806	1.49618
	14.3333	1.46874	1.45791	1.49436
	14.4167	1.46969	1.45773	1.4962
	14.5	1.46851	1.45808	1.49607
	14.5833	1.46918	1.45795	1.49583
	14.6667	1.46913	1.4571	1.49428
	14.75	1.46945	1.45803	1.49419
	14.8333	1.46892	1.45787	1.49513
	14.9167	1.46879	1.45866	1.49462
	15	1.46999	1.45804	1.49526
	15.0833	1.46899	1.45863	1.49518
	15.1667	1.46992	1.45803	1.49514
	15.25	1.4695	1.45776	1.49416
	15.3333	1.46979	1.45815	1.49599
	15.4167	1.46913	1.4582	1.49486
	15.5	1.46907	1.4578	1.49554
	15.5833	1.4689	1.45792	1.49494
	15.6667	1.46973	1.45769	1.49509
	15.75	1.46939	1.45775	1.49468
	15.8333	1.46937	1.45785	1.49481
	15.9167	1.46864	1.45776	1.49533
	16	1.46978	1.45874	1.49455
	16.0833	1.46942	1.45762	1.4945
	16.1667	1.46992	1.45842	1.49398
	16.25	1.46972	1.45795	1.49468
	16.3333	1.46911	1.45843	1.4939
	16.4167	1.46947	1.45772	1.49541
	16.5	1.46851	1.4577	1.49482
	16.5833	1.46826	1.45701	1.49478
	16.6667	1.46883	1.4576	1.49454
	16.75	1.46908	1.45818	1.49526
	16.8333	1.46837	1.45769	1.4945
	16.9167	1.46841	1.45733	1.49421
	17	1.46938	1.45758	1.49447
	17.0833	1.46796	1.45789	1.49447
	17.1667	1.46881	1.45791	1.49484
	17.25	1.46857	1.45736	1.49434
	17.3333	1.46784	1.45685	1.49322
	17.4167	1.46837	1.45754	1.49417
	17.5	1.4685	1.4573	1.49371
	17.5833	1.46999	1.45793	1.49469
	17.6667	1.46851	1.45701	1.49464
	17.75	1.46844	1.45664	1.4942
	17.8333	1.46845	1.45829	1.49356
	17.9167	1.46811	1.45755	1.49378
	18	1.46891	1.45793	1.49485
	18.0833	1.46781	1.45788	1.49422
	18.1667	1.46937	1.45812	1.49448
	18.25	1.46851	1.45783	1.49502
	18.3333	1.46814	1.458	1.49375
	18.4167	1.46886	1.45752	1.49391
	18.5	1.46823	1.458	1.49429
	18.5833	1.46852	1.45814	1.49342
	18.6667	1.46914	1.45807	1.49422
	18.75	1.46915	1.4577	1.49344
	18.8333	1.46941	1.4571	1.49397
	18.9167	1.46817	1.45723	1.49313
	19	1.46838	1.45632	1.49337
	19.0833	1.46743	1.45741	1.49397
	19.1667	1.4683	1.45718	1.49311
	19.25	1.46877	1.45662	1.4943
	19.3333	1.46819	1.45776	1.49357
	19.4167	1.46791	1.4568	1.49417
	19.5	1.46792	1.4569	1.49328
	19.5833	1.46869	1.45712	1.49336
	19.6667	1.46716	1.4563	1.49321
	19.75	1.46752	1.45638	1.49379
	19.8333	1.46831	1.45792	1.49362
	19.9167	1.46703	1.45762	1.49409
	20		1.45719	1.49355

## Sheet: Figure5_S1_source_9
	Time (min)	9	Abs 340 nmReplica 2	Abs 340 nmReplica 3			Equation linear regression trendline	R²
DHX34 D279A	0	1.5743	1.40862	1.38905		Replica 1	y = -7E-05x + 1,5769	R² = 0,2928
	0.0833333	1.57513	1.40784	1.38988		Replica 2	y = -6E-05x + 1,4103	R² = 0,3134
	0.166667	1.57517	1.4082	1.38885		Replica 3	y = -4E-05x + 1,3899	R² = 0,1637
	0.25	1.5743	1.40769	1.3897
	0.333333	1.57484	1.40875	1.38759
	0.416667	1.5748	1.40826	1.38906
	0.5	1.57464	1.40829	1.38847
	0.583333	1.57545	1.40896	1.38859
	0.666667	1.57513	1.40867	1.38915
	0.75	1.57479	1.40945	1.39001
	0.833333	1.57554	1.40767	1.38897
	0.916667	1.57477	1.40825	1.38866
	1	1.57444	1.40912	1.38919
	1.08333	1.57577	1.40789	1.38854
	1.16667	1.57382	1.40874	1.38873
	1.25	1.57472	1.40799	1.38906
	1.33333	1.57528	1.40937	1.38896
	1.41667	1.57487	1.40897	1.38947
	1.5	1.57467	1.40892	1.38932
	1.58333	1.57455	1.40841	1.38848
	1.66667	1.57398	1.40838	1.38873
	1.75	1.57581	1.40821	1.38825
	1.83333	1.57466	1.40786	1.38823
	1.91667	1.5744	1.40874	1.38962
	2	1.57496	1.40802	1.38927
	2.08333	1.57481	1.40787	1.38841
	2.16667	1.57466	1.40923	1.38865
	2.25	1.57532	1.40755	1.38902
	2.33333	1.57564	1.40786	1.38808
	2.41667	1.5748	1.40998	1.38882
	2.5	1.5744	1.40744	1.38963
	2.58333	1.57408	1.40908	1.38874
	2.66667	1.573	1.40847	1.38902
	2.75	1.57571	1.40816	1.3885
	2.83333	1.57478	1.40852	1.38805
	2.91667	1.57461	1.40821	1.38867
	3	1.57465	1.40876	1.38879
	3.08333	1.57454	1.40875	1.38892
	3.16667	1.57475	1.40815	1.38932
	3.25	1.57414	1.40859	1.38915
	3.33333	1.57521	1.40759	1.38912
	3.41667	1.57466	1.40885	1.38817
	3.5	1.57519	1.40744	1.38785
	3.58333	1.5749	1.40827	1.38804
	3.66667	1.57481	1.40916	1.38836
	3.75	1.57419	1.40794	1.38829
	3.83333	1.57319	1.40814	1.388
	3.91667	1.57476	1.4083	1.38753
	4	1.57459	1.40781	1.38894
	4.08333	1.57463	1.40848	1.38858
	4.16667	1.57418	1.40761	1.38869
	4.25	1.57538	1.40786	1.38797
	4.33333	1.57424	1.40839	1.38811
	4.41667	1.57504	1.4087	1.38783
	4.5	1.57467	1.40761	1.38892
	4.58333	1.5744	1.40754	1.38826
	4.66667	1.57498	1.40731	1.38729
	4.75	1.57425	1.40762	1.38809
	4.83333	1.57532	1.40827	1.38884
	4.91667	1.57433	1.40821	1.38872
	5	1.57392	1.40683	1.38796
	5.08333	1.57493	1.40662	1.38806
	5.16667	1.57421	1.40791	1.38889
	5.25	1.57506	1.40828	1.38743
	5.33333	1.57617	1.40838	1.38808
	5.41667	1.57386	1.40781	1.3877
	5.5	1.57507	1.40818	1.38802
	5.58333	1.57606	1.40911	1.38831
	5.66667	1.57468	1.40794	1.38923
	5.75	1.57403	1.40759	1.38913
	5.83333	1.57357	1.40846	1.38836
	5.91667	1.57403	1.40847	1.38839
	6	1.57367	1.40842	1.38802
	6.08333	1.57457	1.40796	1.38828
	6.16667	1.5742	1.4073	1.38822
	6.25	1.57538	1.40767	1.3889
	6.33333	1.57413	1.40878	1.38836
	6.41667	1.57373	1.40872	1.3885
	6.5	1.57502	1.40823	1.38807
	6.58333	1.5741	1.40852	1.38846
	6.66667	1.57423	1.40801	1.38797
	6.75	1.57469	1.40768	1.38775
	6.83333	1.57531	1.40802	1.38877
	6.91667	1.57404	1.40853	1.38775
	7	1.5746	1.4089	1.38816
	7.08333	1.57445	1.4081	1.38845
	7.16667	1.57446	1.40866	1.38822
	7.25	1.57527	1.4091	1.38841
	7.33333	1.57419	1.40812	1.38831
	7.41667	1.57424	1.40867	1.38868
	7.5	1.5741	1.40843	1.38915
	7.58333	1.57393	1.40795	1.38732
	7.66667	1.57484	1.40835	1.38866
	7.75	1.57453	1.40825	1.3882
	7.83333	1.57509	1.40802	1.38786
	7.91667	1.576	1.40841	1.38866
	8	1.57461	1.4086	1.38835
	8.08333	1.57317	1.40791	1.388
	8.16667	1.57488	1.40836	1.38846
	8.25	1.57411	1.40856	1.38888
	8.33333	1.57504	1.40751	1.3884
	8.41667	1.57355	1.40784	1.3878
	8.5	1.57462	1.40801	1.38878
	8.58333	1.57337	1.40793	1.38941
	8.66667	1.57458	1.4073	1.38817
	8.75	1.57392	1.40766	1.38792
	8.83333	1.5747	1.40829	1.3881
	8.91667	1.57343	1.4082	1.38837
	9	1.57399	1.408	1.38847
	9.08333	1.5738	1.40776	1.38786
	9.16667	1.57435	1.40647	1.38876
	9.25	1.57336	1.40762	1.38835
	9.33333	1.57476	1.40836	1.38767
	9.41667	1.57399	1.4075	1.38813
	9.5	1.5743	1.40751	1.38847
	9.58333	1.57415	1.40718	1.38812
	9.66667	1.57482	1.40856	1.38751
	9.75	1.57527	1.40729	1.38897
	9.83333	1.57535	1.40793	1.38758
	9.91667	1.57443	1.4081	1.38813
	10	1.57523	1.40866	1.3891
	10.0833	1.57444	1.40748	1.38742
	10.1667	1.57462	1.40776	1.38789
	10.25	1.57409	1.40934	1.38798
	10.3333	1.57423	1.40792	1.38812
	10.4167	1.57367	1.40812	1.388
	10.5	1.57346	1.40768	1.38919
	10.5833	1.57455	1.40772	1.38866
	10.6667	1.57436	1.40795	1.38833
	10.75	1.57376	1.40798	1.38807
	10.8333	1.57409	1.40748	1.38867
	10.9167	1.57475	1.40831	1.3875
	11	1.57502	1.40803	1.3876
	11.0833	1.57406	1.4086	1.38808
	11.1667	1.57499	1.40753	1.38871
	11.25	1.57367	1.40752	1.38918
	11.3333	1.57393	1.40818	1.38804
	11.4167	1.57318	1.40801	1.38805
	11.5	1.57418	1.40737	1.38789
	11.5833	1.57394	1.40753	1.38788
	11.6667	1.57463	1.40836	1.3882
	11.75	1.57369	1.40668	1.38716
	11.8333	1.57457	1.4077	1.38748
	11.9167	1.57281	1.40758	1.38839
	12	1.57491	1.40734	1.38754
	12.0833	1.57372	1.40743	1.38741
	12.1667	1.5746	1.40811	1.38857
	12.25	1.57519	1.40852	1.38884
	12.3333	1.5742	1.40829	1.38845
	12.4167	1.57413	1.40762	1.38862
	12.5	1.57312	1.40779	1.38838
	12.5833	1.5743	1.40811	1.38887
	12.6667	1.57429	1.407	1.38816
	12.75	1.57394	1.4078	1.3884
	12.8333	1.57438	1.40758	1.38784
	12.9167	1.57358	1.40791	1.38882
	13	1.57369	1.40715	1.38686
	13.0833	1.57424	1.40717	1.38754
	13.1667	1.57496	1.40771	1.38842
	13.25	1.57514	1.40768	1.38728
	13.3333	1.57276	1.40769	1.38779
	13.4167	1.57398	1.40738	1.38773
	13.5	1.57435	1.40738	1.38843
	13.5833	1.57451	1.40695	1.38795
	13.6667	1.57486	1.40756	1.38876
	13.75	1.57393	1.40769	1.38878
	13.8333	1.57365	1.40738	1.38794
	13.9167	1.57366	1.40746	1.38832
	14	1.57388	1.40742	1.38769
	14.0833	1.5734	1.40857	1.38837
	14.1667	1.57308	1.40856	1.38783
	14.25	1.57343	1.40791	1.38823
	14.3333	1.57443	1.40778	1.38819
	14.4167	1.57361	1.40775	1.3884
	14.5	1.57357	1.40737	1.38861
	14.5833	1.574	1.40748	1.3878
	14.6667	1.57333	1.40645	1.38744
	14.75	1.57377	1.40778	1.38849
	14.8333	1.5739	1.40834	1.38854
	14.9167	1.57397	1.40741	1.38726
	15	1.57409	1.40711	1.38905
	15.0833	1.57409	1.4078	1.38826
	15.1667	1.57438	1.40717	1.38772
	15.25	1.57345	1.40742	1.3881
	15.3333	1.57439	1.40659	1.38865
	15.4167	1.5739	1.40716	1.38826
	15.5	1.57306	1.40757	1.38774
	15.5833	1.57324	1.40763	1.38764
	15.6667	1.57265	1.40807	1.38901
	15.75	1.57396	1.40744	1.38886
	15.8333	1.57378	1.4079	1.38772
	15.9167	1.57376	1.40669	1.38701
	16	1.57402	1.40813	1.38744
	16.0833	1.57211	1.40735	1.38853
	16.1667	1.57346	1.40816	1.38881
	16.25	1.5747	1.40787	1.38784
	16.3333	1.57343	1.40742	1.38765
	16.4167	1.57267	1.40793	1.38742
	16.5	1.57323	1.40718	1.38846
	16.5833	1.57381	1.40751	1.38893
	16.6667	1.57465	1.4066	1.38852
	16.75	1.57476	1.40739	1.3885
	16.8333	1.57388	1.40763	1.38823
	16.9167	1.57328	1.40773	1.3879
	17	1.57298	1.408	1.38835
	17.0833	1.57366	1.409	1.38778
	17.1667	1.57228	1.40717	1.38799
	17.25	1.57317	1.4076	1.38752
	17.3333	1.57417	1.40758	1.38803
	17.4167	1.57414	1.40707	1.38759
	17.5	1.57355	1.40719	1.38765
	17.5833	1.57459	1.40723	1.38838
	17.6667	1.57303	1.40767	1.38782
	17.75	1.57418	1.40707	1.38872
	17.8333	1.57426	1.40714	1.38744
	17.9167	1.57356	1.40761	1.38824
	18	1.57413	1.40836	1.38798
	18.0833	1.57452	1.40715	1.38747
	18.1667	1.57509	1.40787	1.38887
	18.25	1.57358	1.40731	1.38795
	18.3333	1.57408	1.40697	1.38728
	18.4167	1.57406	1.40784	1.38748
	18.5	1.57421	1.40721	1.38774
	18.5833	1.57328	1.40784	1.38773
	18.6667	1.57448	1.40769	1.38811
	18.75	1.57371	1.40648	1.38821
	18.8333	1.57293	1.40823	1.38778
	18.9167	1.57294	1.40766	1.38914
	19	1.57381	1.40656	1.38817
	19.0833	1.57389	1.40664	1.38806
	19.1667	1.57338	1.40674	1.38856
	19.25	1.5737	1.40775	1.38802
	19.3333	1.57387	1.40694	1.38806
	19.4167	1.57349	1.40664	1.38856
	19.5	1.57411	1.40807	1.38741
	19.5833	1.574	1.40775	1.38767
	19.6667	1.57429	1.40683	1.38852
	19.75	1.57337	1.40746	1.38809
	19.8333	1.57398	1.40777	1.38808
	19.9167	1.57322	1.4067	1.38827
	20	1.57384	1.40684	1.38905

## Sheet: Figure5_S3_source_10
	Time (min)	Abs 340 nm Replica 1	Abs 340 nmReplica 2	Abs 340 nmReplica 3	Abs 340 nm Replica 4		Equation linear regression trendline	R²
Untagged RUVBL1-RUVBL2	0	1.38204	1.43392	1.41942	1.41857	Replica 1	y = -0,0013x + 1,4225	R² = 0,9904
	0.0833333	1.38221	1.43545	1.41954	1.41904	Replica 2	y = -0,0008x + 1,4601	R² = 0,9867
	0.166667	1.38236	1.43541	1.41912	1.41885	Replica 3	y = -0,0011x + 1,4528	R² = 0,9895
	0.25	1.38119	1.43381	1.42006	1.41842	Replica 4	y = -0,0012x + 1,4569	R² = 0,9911
	0.333333	1.38173	1.43556	1.42002	1.41778
	0.416667	1.38195	1.43523	1.41938	1.41823
	0.5	1.38135	1.43487	1.41861	1.41842
	0.583333	1.38185	1.43456	1.41967	1.41847
	0.666667	1.38188	1.4348	1.4189	1.41788
	0.75	1.38105	1.43552	1.41911	1.41817
	0.833333	1.38123	1.43486	1.4193	1.41715
	0.916667	1.38156	1.43406	1.4196	1.41837
	1	1.38147	1.43475	1.41867	1.41785
	1.08333	1.38167	1.43339	1.41804	1.41672
	1.16667	1.3809	1.4336	1.41828	1.41872
	1.25	1.38051	1.4346	1.41787	1.41718
	1.33333	1.3813	1.43379	1.41835	1.41743
	1.41667	1.38027	1.43468	1.41768	1.41751
	1.5	1.37983	1.43374	1.41827	1.41644
	1.58333	1.38048	1.43372	1.4182	1.41744
	1.66667	1.38024	1.43352	1.419	1.41804
	1.75	1.38003	1.43482	1.41826	1.41634
	1.83333	1.38007	1.43386	1.41731	1.41633
	1.91667	1.38027	1.43346	1.41723	1.41696
	2	1.37927	1.43291	1.41787	1.41584
	2.08333	1.3812	1.43387	1.41784	1.41636
	2.16667	1.37952	1.43375	1.41756	1.41645
	2.25	1.3797	1.43432	1.41786	1.416
	2.33333	1.37943	1.43376	1.41805	1.41537
	2.41667	1.38064	1.43417	1.41716	1.41646
	2.5	1.37937	1.433	1.41766	1.41529
	2.58333	1.37861	1.43358	1.41792	1.41606
	2.66667	1.37899	1.43272	1.41741	1.41529
	2.75	1.37857	1.43314	1.41764	1.41657
	2.83333	1.37958	1.43353	1.4168	1.41587
	2.91667	1.37933	1.43378	1.41815	1.41569
	3	1.37926	1.43397	1.41702	1.41482
	3.08333	1.37877	1.43381	1.41717	1.41585
	3.16667	1.37898	1.4327	1.41692	1.41448
	3.25	1.37904	1.43315	1.41689	1.41592
	3.33333	1.37815	1.43329	1.41597	1.41508
	3.41667	1.37877	1.43348	1.41725	1.41528
	3.5	1.37732	1.43274	1.41704	1.41503
	3.58333	1.37759	1.43278	1.41673	1.41455
	3.66667	1.37829	1.43304	1.41598	1.4151
	3.75	1.3787	1.43325	1.4159	1.41519
	3.83333	1.37839	1.43251	1.41617	1.41411
	3.91667	1.37706	1.4329	1.41529	1.41493
	4	1.37746	1.43262	1.41695	1.41492
	4.08333	1.3785	1.43276	1.41701	1.41431
	4.16667	1.37856	1.43219	1.41626	1.41407
	4.25	1.3772	1.43248	1.41681	1.41411
	4.33333	1.37799	1.43234	1.416	1.41439
	4.41667	1.37652	1.43163	1.41605	1.41466
	4.5	1.37682	1.43228	1.41608	1.4143
	4.58333	1.37629	1.43229	1.41542	1.41379
	4.66667	1.37662	1.43172	1.41526	1.41433
	4.75	1.37691	1.43071	1.41599	1.4145
	4.83333	1.37785	1.43167	1.41489	1.4138
	4.91667	1.37635	1.43132	1.4158	1.41377
	5	1.37668	1.43159	1.41484	1.41325
	5.08333	1.37738	1.43184	1.41577	1.41391
	5.16667	1.3766	1.4313	1.41564	1.41383
	5.25	1.37593	1.43194	1.41452	1.41336
	5.33333	1.37528	1.43187	1.41447	1.41315
	5.41667	1.37604	1.43201	1.41536	1.41294
	5.5	1.37613	1.43162	1.41315	1.4131
	5.58333	1.37592	1.43166	1.41459	1.41283
	5.66667	1.3764	1.43116	1.41407	1.41237
	5.75	1.37583	1.43048	1.41441	1.41231
	5.83333	1.37539	1.43022	1.41466	1.41214
	5.91667	1.37533	1.43058	1.41438	1.41277
	6	1.37481	1.43132	1.41336	1.41164
	6.08333	1.37569	1.43037	1.41327	1.41186
	6.16667	1.3753	1.4315	1.41418	1.41289
	6.25	1.3753	1.4311	1.41418	1.41213
	6.33333	1.37629	1.43054	1.41369	1.41151
	6.41667	1.37466	1.42989	1.41387	1.41287
	6.5	1.37551	1.43044	1.41321	1.41223
	6.58333	1.37539	1.42888	1.41397	1.41167
	6.66667	1.37489	1.43044	1.41327	1.41159
	6.75	1.37407	1.42995	1.41233	1.41151
	6.83333	1.3751	1.4304	1.41412	1.41105
	6.91667	1.37536	1.43035	1.41341	1.41221
	7	1.3755	1.43077	1.41341	1.4107
	7.08333	1.37329	1.42914	1.41461	1.41128
	7.16667	1.37388	1.42998	1.41369	1.41189
	7.25	1.37387	1.43032	1.41265	1.41046
	7.33333	1.37405	1.4293	1.41285	1.41135
	7.41667	1.37434	1.42922	1.41346	1.41057
	7.5	1.37424	1.42996	1.41205	1.4116
	7.58333	1.37338	1.42988	1.41366	1.41091
	7.66667	1.37327	1.42962	1.41293	1.40959
	7.75	1.3742	1.43005	1.4126	1.40929
	7.83333	1.37291	1.43068	1.41182	1.40969
	7.91667	1.37332	1.42928	1.41306	1.41044
	8	1.37359	1.4298	1.412	1.40964
	8.08333	1.37373	1.42889	1.41233	1.40976
	8.16667	1.3738	1.42798	1.41204	1.41032
	8.25	1.3726	1.429	1.4123	1.4107
	8.33333	1.37349	1.42813	1.41177	1.40865
	8.41667	1.37362	1.42902	1.41084	1.40919
	8.5	1.37283	1.4289	1.41201	1.40905
	8.58333	1.373	1.42931	1.41155	1.4098
	8.66667	1.37246	1.42858	1.41108	1.40928
	8.75	1.37191	1.42909	1.41092	1.4094
	8.83333	1.37242	1.42889	1.41187	1.40868
	8.91667	1.37216	1.42869	1.41156	1.40878
	9	1.37252	1.42778	1.41095	1.40891
	9.08333	1.37182	1.42883	1.41215	1.40866
	9.16667	1.37209	1.42763	1.41068	1.40898
	9.25	1.37194	1.42845	1.41082	1.40862
	9.33333	1.37192	1.42835	1.41094	1.40964
	9.41667	1.37125	1.42845	1.41014	1.40746
	9.5	1.37233	1.42733	1.41067	1.40876
	9.58333	1.37289	1.42872	1.40994	1.40732
	9.66667	1.37149	1.4274	1.41065	1.40781
	9.75	1.37149	1.42809	1.40979	1.40799
	9.83333	1.37081	1.42804	1.41021	1.40848
	9.91667	1.37131	1.4279	1.41003	1.40767
	10	1.37078	1.42774	1.41145	1.40815
	10.0833	1.37066	1.42771	1.40955	1.40776
	10.1667	1.37009	1.42801	1.40956	1.4075
	10.25	1.37082	1.42677	1.40978	1.4063
	10.3333	1.37014	1.42765	1.41044	1.40702
	10.4167	1.3706	1.42767	1.40929	1.40728
	10.5	1.37027	1.42691	1.41037	1.40667
	10.5833	1.36968	1.42682	1.40948	1.40702
	10.6667	1.37041	1.42762	1.40894	1.40732
	10.75	1.36962	1.42713	1.40986	1.40642
	10.8333	1.36977	1.42603	1.40916	1.4066
	10.9167	1.37005	1.42622	1.40895	1.40675
	11	1.36948	1.42579	1.40909	1.4066
	11.0833	1.37017	1.42572	1.41002	1.40567
	11.1667	1.36906	1.42717	1.40887	1.40635
	11.25	1.36906	1.4259	1.40909	1.4067
	11.3333	1.36908	1.42578	1.4088	1.40606
	11.4167	1.36878	1.42643	1.40789	1.40651
	11.5	1.36921	1.42732	1.40917	1.40595
	11.5833	1.36904	1.42673	1.40763	1.40539
	11.6667	1.36753	1.42577	1.40788	1.40565
	11.75	1.36823	1.42626	1.40872	1.40504
	11.8333	1.36883	1.42596	1.40753	1.40543
	11.9167	1.36761	1.42501	1.40822	1.40496
	12	1.36846	1.42681	1.40784	1.40513
	12.0833	1.36772	1.42561	1.40772	1.40528
	12.1667	1.36791	1.42565	1.40692	1.40494
	12.25	1.36714	1.42692	1.40815	1.40509
	12.3333	1.36795	1.42582	1.40798	1.40543
	12.4167	1.3677	1.42539	1.40812	1.40504
	12.5	1.3666	1.42608	1.40678	1.40487
	12.5833	1.36698	1.42506	1.40693	1.4033
	12.6667	1.36663	1.42565	1.40653	1.40363
	12.75	1.36693	1.42498	1.40696	1.40448
	12.8333	1.36619	1.42535	1.40749	1.4043
	12.9167	1.36608	1.42526	1.4073	1.4047
	13	1.36758	1.42554	1.40672	1.40383
	13.0833	1.36647	1.42541	1.40685	1.40329
	13.1667	1.36591	1.4255	1.40681	1.40374
	13.25	1.36643	1.42484	1.407	1.40358
	13.3333	1.3661	1.42448	1.40646	1.40262
	13.4167	1.36579	1.42465	1.40646	1.40323
	13.5	1.36529	1.42504	1.40656	1.40317
	13.5833	1.36575	1.42426	1.40531	1.40347
	13.6667	1.36525	1.42403	1.40613	1.40259
	13.75	1.36561	1.42564	1.40609	1.40298
	13.8333	1.36581	1.42534	1.40621	1.4038
	13.9167	1.36558	1.42391	1.40694	1.40306
	14	1.36448	1.42419	1.40523	1.40242
	14.0833	1.36519	1.42425	1.40663	1.40268
	14.1667	1.36569	1.42418	1.40534	1.40207
	14.25	1.3651	1.42479	1.4051	1.40261
	14.3333	1.36522	1.4243	1.40528	1.40249
	14.4167	1.36525	1.42364	1.40489	1.40183
	14.5	1.36372	1.42314	1.40519	1.40171
	14.5833	1.36348	1.42353	1.40509	1.40031
	14.6667	1.36389	1.42412	1.40455	1.40214
	14.75	1.36491	1.42456	1.405	1.40191
	14.8333	1.36438	1.4242	1.40451	1.40155
	14.9167	1.36287	1.42279	1.40445	1.40103
	15	1.3633	1.42336	1.40478	1.40158
	15.0833	1.36421	1.42252	1.40456	1.40055
	15.1667	1.36333	1.42276	1.40479	1.40141
	15.25	1.36256	1.4233	1.40376	1.40058
	15.3333	1.36305	1.42247	1.40351	1.40123
	15.4167	1.36306	1.42344	1.40443	1.40086
	15.5	1.36299	1.42302	1.40455	1.40007
	15.5833	1.36282	1.42293	1.40315	1.39945
	15.6667	1.36355	1.42244	1.40382	1.39984
	15.75	1.36234	1.42318	1.40372	1.39979
	15.8333	1.36235	1.42338	1.40303	1.39871
	15.9167	1.36199	1.42278	1.4033	1.40012
	16	1.36184	1.42321	1.4034	1.39977
	16.0833	1.36174	1.42319	1.40351	1.40002
	16.1667	1.36208	1.42231	1.40355	1.40081
	16.25	1.36155	1.42235	1.40318	1.39897
	16.3333	1.36153	1.42228	1.4031	1.39916
	16.4167	1.36121	1.42275	1.40316	1.39878
	16.5	1.36116	1.42231	1.40257	1.39959
	16.5833	1.36081	1.42219	1.40235	1.39919
	16.6667	1.36186	1.42213	1.40185	1.39865
	16.75	1.36076	1.42146	1.40265	1.39843
	16.8333	1.36053	1.42249	1.40261	1.39857
	16.9167	1.36015	1.42226	1.40202	1.39779
	17	1.36062	1.42134	1.40103	1.39752
	17.0833	1.35971	1.42174	1.401	1.39769
	17.1667	1.36094	1.42199	1.40221	1.39753
	17.25	1.36049	1.4222	1.40179	1.39797
	17.3333	1.36052	1.42214	1.40175	1.39665
	17.4167	1.35963	1.42113	1.40175	1.39687
	17.5	1.36018	1.42143	1.4014	1.39712
	17.5833	1.35832	1.42142	1.40172	1.39724
	17.6667	1.35936	1.4215	1.40134	1.39666
	17.75	1.35936	1.42121	1.40168	1.39674
	17.8333	1.35969	1.42041	1.40035	1.39762
	17.9167	1.35984	1.42125	1.40103	1.39715
	18	1.35998	1.42054	1.40034	1.39643
	18.0833	1.35945	1.42055	1.40009	1.39705
	18.1667	1.35877	1.41981	1.40066	1.39653
	18.25	1.35821	1.42101	1.39995	1.39681
	18.3333	1.35897	1.41991	1.40001	1.39556
	18.4167	1.35904	1.42053	1.40011	1.39693
	18.5	1.35794	1.41984	1.39989	1.39497
	18.5833	1.35811	1.42029	1.40023	1.3954
	18.6667	1.35858	1.42004	1.40022	1.39617
	18.75	1.35764	1.42009	1.4001	1.39581
	18.8333	1.35731	1.41942	1.39939	1.39525
	18.9167	1.35816	1.42013	1.39982	1.39593
	19	1.35751	1.41952	1.3991	1.39584
	19.0833	1.35754	1.4192	1.39837	1.39492
	19.1667	1.35788	1.41924	1.39839	1.39472
	19.25	1.35631	1.41922	1.39883	1.39433
	19.3333	1.35701	1.41922	1.39877	1.39504
	19.4167	1.35704	1.42007	1.39908	1.3952
	19.5	1.35687	1.41965	1.39942	1.39511
	19.5833	1.35719	1.4192	1.39894	1.39469
	19.6667	1.35688	1.4188	1.39815	1.39366
	19.75	1.35626	1.41886	1.39793	1.39407
	19.8333	1.35548	1.41834	1.39822	1.39369
	19.9167	1.3556	1.41989	1.39786	1.39397
	20	1.35617	1.41871	1.39761	1.3935

[truncated: 5 more sheets: Figure5_S3_source_11, Figure5_S3_source_12, Figure5_S3_source_13, Figure5_S3_source_14, Figure5_S3_source_15]
